1    **Development of a mini-replicon-based reverse-genetics system for**  
2    **rice stripe tenuivirus**

3    Mingfeng Feng<sup>1</sup>, Luyao Li<sup>1</sup>, Ruixiang Cheng<sup>1</sup>, Yulong Yuan<sup>1</sup>, Yongxin Dong<sup>1</sup>, Minglong Chen<sup>1</sup>,  
4    Rong Guo<sup>1</sup>, Min Yao<sup>1</sup>, Yi Xu<sup>1</sup>, Yijun Zhou<sup>2</sup>, Jianxiang Wu<sup>3</sup>, Xin Shun Ding<sup>1</sup>, Xueping Zhou<sup>3,4,\*</sup>,  
5    and Xiaorong Tao<sup>1,\*</sup>

6    <sup>1</sup> Key Laboratory of Plant Immunity, Department of Plant Pathology, College of Plant Protection,  
7    Nanjing Agricultural University, Nanjing 210095, P. R. China.

8    <sup>2</sup> Institute of Plant Protection, Jiangsu Academy of Agricultural Sciences, Jiangsu Technical  
9    Service Center of Diagnosis and Detection for Plant Virus Diseases, Nanjing 210014, P.R. China

10    <sup>3</sup> State Key Laboratory of Rice Biology, Institute of Biotechnology, Zhejiang University,  
11    Hangzhou 310029, P. R. China

12    <sup>4</sup> State Key Laboratory for Biology of Plant Diseases and Insect Pests, Institute of Plant Protection,  
13    Chinese Academy of Agricultural Sciences, Beijing 100193, P. R. China

14

15    \*For Correspondence:

16    Xiaorong Tao (taoxiaorong@njau.edu.cn); Xueping Zhou (zzhou@zju.edu.cn)

17

18

19

20    **Running Title**

21    **A mini-replicon-based reverse-genetics system for RSV**

22

23

## 24 **ABSTRACT**

25 Negative-stranded RNA (NSR) viruses include both animal- and plant-infecting  
26 viruses that often cause serious diseases in human and livestock, and in agronomic  
27 crops. Rice stripe tenuivirus (RSV), a plant NSR virus with four  
28 negative-stranded/ambisense RNA segments, is one of the most destructive rice  
29 pathogens in many Asian countries. Due to the lack of a reliable reverse-genetics  
30 technology, molecular studies of RSV gene functions and its interaction with host  
31 plants are severely hampered. To overcome this obstacle, we developed a  
32 mini-replicon-based reverse-genetics system for RSV gene functional analysis in  
33 *Nicotiana benthamiana*. We first developed a mini-replicon system expressing RSV  
34 genomic RNA3 eGFP reporter (MR3<sub>(-)eGFP</sub>), a nucleocapsid (NP), and a codon usage  
35 optimized RNA-dependent RNA polymerase (RdRp<sub>opt</sub>), respectively. Using this  
36 mini-replicon system we determined that RSV NP and RdRp<sub>opt</sub> are indispensable for  
37 the eGFP expression from MR3<sub>(-)eGFP</sub>. The expression of eGFP from MR3<sub>(-)eGFP</sub> can be  
38 significantly enhanced in the presence of NSs and P19-HcPro- $\gamma$ b. In addition, NSvc4,  
39 the movement protein of RSV, facilitated eGFP trafficking between cells. We also  
40 developed an antigenomic RNA3-based replicon in *N. benthamiana*. However, we  
41 found that the RSV NS3 coding sequence acts as a *cis*-element to regulate viral RNA  
42 expression. Finally, we made mini-replicons representing all four RSV genomic  
43 RNAs. This is the first mini-replicon-based reverse-genetics system for  
44 monocot-infecting tenuivirus. We believe that this mini-replicon system described  
45 here will allow the studies of RSV replication, transcription, cell-to-cell movement

46 and host machinery underpinning RSV infection in plants.

47 **KEY WORDS:** *Rice stripe tenuivirus*, reverse-genetics system, mini-replicon,  
48 negative-sense/ambisense RNA virus

49

## 50 **IMPORTANCE**

51 Plant-infecting segmented negative-stranded RNA (NSR) viruses are grouped into 3  
52 genera: *Orthospovirus*, *Tenuivirus* and *Emaravirus*. The reverse-genetics systems  
53 have been established for members in the genera *Orthospovirus* and *Emaravirus*,  
54 respectively. However, there is still no reverse-genetics system available for  
55 *Tenuivirus*. Rice stripe virus (RSV) is a monocot-infecting tenuivirus with four  
56 negative-stranded/ambisense RNA segments. It is one of the most destructive rice  
57 pathogens and causes significant damages to rice industry in Asian countries. Due to  
58 the lack of a reliable reverse-genetics system, molecular characterizations of RSV  
59 gene functions and the host machinery underpinning RSV infection in plants are  
60 extremely difficult. To overcome this obstacle, we developed a mini-replicon-based  
61 reverse-genetics system for RSV in *Nicotiana benthamiana*. This is the first  
62 mini-replicon-based reverse-genetics system for tenuivirus. We consider that this  
63 system will provide researchers a new working platform to elucidate the molecular  
64 mechanisms dictating segmented tenuivirus infections in plant.

65

## 66 **Introduction**

67 Negative-sense RNA (NSR) viruses include well-known members of medical  
68 importance such as Ebola virus (EBOV), vesicular stomatitis virus (VSV), influenza  
69 A virus (FLUAV) and Rift Valley fever virus (RVFV) (1, 2) and include serious plant  
70 pathogens of agronomical importance such as Tomato spotted wilt virus (TSWV),  
71 Rice stripe virus (RSV), and Rose rosette virus (RRV) (3-5). There are 3 genera of  
72 segmented NSR viruses infecting plants: *Orthospovirus*, *Tenuivirus* and *Emaravirus*.  
73 TSWV and RSV are the representative viruses for *Orthospovirus* and *Tenuivirus*,  
74 respectively (6, 7). RRV and *European mountain ash ringspot-associated virus*  
75 (EMArV) are important members in the genus *Emaravirus* (8, 9).

76 Tenuiviruses are classified in the genus *Tenuivirus*, family *Phenuiviridae* within  
77 the order *Bunyavirales*. Most viruses in the family *Phenuiviridae* infect animals. RSV  
78 is one of most devastating causal agents of rice and often causes severe damages to  
79 rice production in China and many other Asian countries (6, 10, 11). RSV is  
80 transmitted by small brown planthopper (*Laodelphax striatellus*) in a persistent and  
81 circulative-propagative manner (6, 12-14). RSV genome consists of four RNA  
82 segments and encodes seven proteins through an antisense or an ambisense coding  
83 strategy (15-18). RSV RNA1 is of negative polarity and encodes the RNA-dependent  
84 RNA polymerase (RdRp) (17). RSV RNA2 encodes the NS2 protein in the viral (v)  
85 strand and the NSvc2 protein from the viral complementary (vc) strand (19). The NS2  
86 protein is a weak viral suppressor of RNA silencing (VSR) and is required for RSV  
87 systemic infection in plants. The NSvc2 protein is a putative glycoprotein that targets

88 endoplasmic reticulum (ER) and Golgi apparatus, and function as a helper factor to  
89 conquer insect midgut barriers after being cleaved into two mature proteins (i.e.,  
90 NSvc2-N, the amino-terminal half, and NSvc2-C, the carboxyl-terminal half) (12, 20).  
91 RSV RNA3 encodes the NS3 protein in the v strand, and is known as a VSR that  
92 binds single- and double-stranded RNAs to suppress RNA silencing (21, 22), and the  
93 NP protein in the vc strand that interacts with viral genomic RNAs to form viral  
94 ribonucleoprotein complexes (RNPs) (23). RSV RNA4 encodes the SP protein in the  
95 v strand, a nonstructural and disease-specific protein that interacts with a host  
96 oxygen-evolving complex protein to interfere host photosynthesis, and the NSvc4  
97 protein in the vc strand, a protein involved in RSV cell-to-cell and long-distance  
98 movement in plant (4, 21). The four RSV genomic RNAs all contain highly conserved  
99 5'- and 3'-untranslated regions (UTR), important for the initiation of viral RNA  
100 transcriptions. RSV RNA2, 3 and 4 all have a noncoding intergenic region (IGR) with  
101 multiple AU-rich regions that form secondary hairpin-like structures to act as  
102 transcription termination signals (24, 25).

103       Viral reverse-genetics systems are important tools for the studies of viral gene  
104 functions, disease inductions and host factors involved in virus infection in plants  
105 (26-32). Although reverse-genetics systems have been firstly reported for animal  
106 segmented negative-stranded RNA viruses over 20 years ago (26, 33-43), to establish  
107 similar systems for plant segmented negative-stranded/ambisense RNA viruses turned  
108 out to be very challenging. However, just recently the reverse-genetics systems have  
109 been established for a few of non-segmented and segmented plant NSR viruses. The

110 first reverse-genetics system of the non-segmented plant NSR viruses was established  
111 for *Sonchus yellow net virus* (SYNV, a nucleorhabdovirus) and followed with  
112 BYSMV (a cytorhabdovirus) (27, 44-47). Recently we established the first  
113 reverse-genetics system of segmented plant NSR viruses for TSWV (48). Soon after,  
114 the reverse-genetics system for RRV was also established, allowing for studies of  
115 emaravirus gene function and disease pathology in whole plants (9).

116 For 3 genera of segmented NSR viruses infecting plants, reverse-genetics model  
117 has been established for 2 of the genera, *Orthospovirus* and *Emaravirus* (9, 48, 49).  
118 However, there is still no reverse-genetics system available for the genus *Tenuivirus*.  
119 The recent progresses on TSWV and RRV reverse-genetics system encouraged us to  
120 establish a reverse-genetics system for RSV. In this study, we developed a  
121 mini-replicon-based reverse-genetics system for RSV gene function analyses in  
122 *Nicotiana benthamiana*. This represents the first mini-replicon-based reverse-genetics  
123 system for monocot-infecting tenuivirus. The developed mini-replicon  
124 reverse-genetics system will provide researchers a novel platform for studies of RSV  
125 replication, transcription, movement and host factors involved in the interactions  
126 between the virus and the host plant. This system also provides useful basis for the  
127 development of infectious RSV clones for the assays in plants, including rice.

128

129

130 **Results**

131 **Development of a genomic RNA3 mini-replicon-based reverse-genetics system**  
132 **for RSV**

133 To establish a mini-replicon-based reverse-genetics system to investigate RSV  
134 infection in plant, we RT-PCR-amplified the full-length RSV RNA3 sequence and  
135 inserted it between an HH sequence and an RZ sequence in the  
136 pCB301-2×35S-RZ-NOS vector to produce RNA3<sub>(-)</sub>. We then replaced the NP gene in  
137 RNA3<sub>(-)</sub> with an *eGFP* gene to produce MR3<sub>(-)eGFP</sub> mini-replicon reporter (Fig. 1A).  
138 The expressions of RNA3<sub>(-)</sub> and MR3<sub>(-)eGFP</sub> from these two vectors are driven by a  
139 doubled *Cauliflower mosaic virus* (CaMV) 35S promoter (2×35S) (Fig. 1A).

140 We constructed p2300-RdRp<sub>wt</sub>, pBIN-NS3, p2300-NP, and pCXSN-NSvc4 to  
141 express the wild-type RSV RdRp (RdRp<sub>wt</sub>), NS3, NP, and NSvc4, respectively, in  
142 cells through agro-infiltration. After infiltration of a mixed *Agrobacterium* culture  
143 carrying the plasmids of MR3<sub>(-)eGFP</sub>, RdRp<sub>wt</sub>, NP and four VSRs (NSs and  
144 P19-HcPro-γb) into *N. benthamiana* leaves (Fig 1B), no eGEP fluorescence was  
145 observed in the infiltrated leaves by 5 days post agro-infiltration (dpi) (Fig. 1C). As  
146 reported for TSWV RdRp (48), the wild-type RSV RdRp was also predicted to have  
147 numerous putative intron splicing sites. This prediction prompted us to optimize its  
148 codon usage and to remove the predicted intron splicing sites. The optimized *RdRp*  
149 ORF was then inserted into the p2300 vector to produce p2300-RdRp<sub>opt</sub> (RdRp<sub>opt</sub>).  
150 After infiltrating *N. benthamiana* leaves with a mixed *Agrobacterium* culture carrying  
151 plasmids of MR3<sub>(-)eGFP</sub>, RdRp<sub>opt</sub>, NP and four VSRs, we observed the eGFP

152 fluorescence using a microscope at 5 dpi (Fig. 1B), suggesting that the sequence  
153 optimized RdRp<sub>opt</sub> is now functional in *N. benthamiana* cells.

154

### 155 **RSV NP and RdRp<sub>opt</sub> are required for MR3<sub>(-)eGFP</sub> expression**

156 To investigate the roles of NP and RdRp<sub>opt</sub> in RSV replication in plant, we  
157 co-expressed MR3<sub>(-)eGFP</sub> and VSRs with empty vector (Vec), NP, RdRp<sub>opt</sub>, or both NP  
158 and RdRp<sub>opt</sub>, respectively, in *N. benthamiana* leaves through agro-infiltration. The  
159 eGFP fluorescence was again detected in the leaves co-expressing MR3<sub>(-)eGFP</sub> with NP  
160 and RdRp<sub>opt</sub>. In contrast, the control leaves expressing MR3<sub>(-)eGFP</sub> alone, or  
161 co-expressing MR3<sub>(-)eGFP</sub> with NP or RdRp<sub>opt</sub>, did not show any eGFP fluorescence  
162 (Fig. 2A), indicating that the presence of both NP and RdRp<sub>opt</sub> is necessary for  
163 MR3<sub>(-)eGFP</sub> expression from the mini-replicon.

164 To confirm this observation, we analyzed the accumulation levels of eGFP  
165 protein, *eGFP* mRNA, and MR3<sub>(-)eGFP</sub> genomic RNA (gRNA) and anti-genomic RNA  
166 (agRNA) in the infiltrated *N. benthamiana* leaf tissues. Western blot showed high  
167 levels of eGFP in the leaves co-expressing MR3<sub>(-)eGFP</sub>, NP, RdRp<sub>opt</sub> and four VSRs  
168 (NSs+P19-HcPro- $\gamma$ b). In contrast, eGFP protein was not detected in the control leaves  
169 co-expressing MR3<sub>(-)eGFP</sub> with Vec, NP or RdRp<sub>opt</sub> only by 5 dpi (Fig. 2B). Northern  
170 blot results showed that the gRNA and agRNA were detected in the leaf tissues  
171 co-expressing MR3<sub>(-)eGFP</sub>, NP, RdRp<sub>opt</sub> and VSRs by 5 dpi (Fig. 2C). In contrast, no  
172 amplified gRNA and agRNA were detected in the control leaves co-expressing  
173 MR3<sub>(-)eGFP</sub> with Vec, NP or RdRp only, respectively (Fig. 2C). Only primary



174 transcripts of agRNA from MR3<sub>(-)eGFP</sub> was detected in these leaves. These results  
175 indicate that the presence of RSV NP and RdRp<sub>opt</sub> are required for the replication of  
176 both gRNA and agRNA from the MR3<sub>(-)eGFP</sub> mini-replicon. Intrinsically, the *eGFP*  
177 mRNA was not detected in the leaf tissues co-expressing MR3<sub>(-)eGFP</sub>, NP, RdRp<sub>opt</sub> and  
178 VSRs.

179

### 180 **Effect of viral suppressors of RNA silencing on MR3<sub>(-)eGFP</sub> expression**

181 Viral suppressors of RNA silencing (VSRs) inhibit host RNAi machinery and enhance  
182 non-viral gene expressions in plants (44, 46). To investigate the roles of different  
183 VSRs on MR3<sub>(-)eGFP</sub> expression in plant, we infiltrated *N. benthamiana* leaves with  
184 mixed agrobacterium cultures carrying MR3<sub>(-)eGFP</sub>, RdRp<sub>opt</sub>, NP and VSRs including  
185 NS3, NSs, and P19-HcPro- $\gamma$ b, respectively. By 5 dpi, the leaves co-expressing  
186 MR3<sub>(-)eGFP</sub>, RdRp<sub>opt</sub> and NP with Vec showed a few cells with eGFP fluorescence.  
187 Many cells with eGFP fluorescence were observed in the leaves co-expressing  
188 MR3<sub>(-)eGFP</sub>, RdRp<sub>opt</sub> and NP with three VSRs (P19-HcPro- $\gamma$ b) or four VSRs (NSs  
189 and P19-HcPro- $\gamma$ b) (Fig. 3A and 3B). Although RSV NS3 is a VSR (21, 22),  
190 co-expression of MR3<sub>(-)eGFP</sub>, RdRp<sub>opt</sub>, NP with NS3 or both NS3 and NSs resulted in  
191 almost no cell with eGFP fluorescence. Moreover, co-expression of MR3<sub>(-)eGFP</sub>,  
192 RdRp<sub>opt</sub>, NP with both NS3 and P19-HcPro- $\gamma$ b resulted in some cells with eGFP  
193 fluorescence. These findings indicate that RSV NS3 can suppress eGFP expression  
194 from the MR3<sub>(-)eGFP</sub> mini-replicon, and are supported by the Western blot result (Fig.  
195 3B). Based on these results, we decided to use VSRs including NSs, P19, HcPro and

196  $\gamma b$  but not NS3 in the following experiments.

197

### 198 **Dosage effects of NP and RdRp<sub>opt</sub> on MR3<sub>(-)eGFP</sub> expression**

199 To optimize the expression of MR3<sub>(-)eGFP</sub> mini-replicon in plant cells, we mixed the  
200 Agrobacterium culture carrying MR3<sub>(-)eGFP</sub> and four VSRs (NSs+P19-HcPro- $\gamma b$ ) with  
201 the Agrobacterium cultures carrying NP (OD<sub>600</sub> 0, 0.05, 0.1, 0.2 or 0.4) or RdRp<sub>opt</sub>  
202 (OD<sub>600</sub> 0, 0.05, 0.1, 0.2 or 0.4), and then infiltrated them individually into *N.*  
203 *benthamiana* leaves. When the concentration of Agrobacterium culture carrying RdRp  
204 was fixed at OD<sub>600</sub> 0.05 and the concentration of Agrobacterium culture carrying NP  
205 was increased from OD<sub>600</sub> 0.05 to OD<sub>600</sub> 0.4, the results showed that the strongest  
206 eGFP fluorescence was observed in the leaves co-expressing MR3<sub>(-)eGFP</sub> with NP at  
207 OD<sub>600</sub> 0.2 and RdRp<sub>opt</sub> at OD<sub>600</sub> 0.05 (Fig. 4A). When the concentration of  
208 Agrobacterium culture carrying NP was maintained at OD<sub>600</sub> 0.2, while the  
209 concentration of Agrobacterium culture carrying RdRp<sub>opt</sub> was increased from OD<sub>600</sub>  
210 0.05 to OD<sub>600</sub> 0.4, the number of cells with eGFP fluorescence decreased as the  
211 concentration of RdRp<sub>opt</sub> increased (Fig. 4B). These results were supported by the  
212 results from Western blot assays (Fig. 4C and 4D).

213

### 214 **RSV NSvc4 supports MR3<sub>(-)eGFP</sub> cell-to-cell movement**

215 NSvc4 is the movement protein of RSV (18, 50). To investigate whether NSvc4 can  
216 also influence MR3<sub>(-)eGFP</sub> expression, we infiltrated *N. benthamiana* leaves with the  
217 mixed Agrobacterium cultures carrying MR3<sub>(-)eGFP</sub> (OD<sub>600</sub> 0.2), NP (OD<sub>600</sub> 0.2),

218 RdRp<sub>opt</sub> (OD<sub>600</sub> 0.05), NSs (OD<sub>600</sub> 0.05), P19-HcPro- $\gamma$ b (OD<sub>600</sub> 0.05) and NSvc4  
219 (OD<sub>600</sub> 0.025, 0.05, 0.1 or 0.15). In this experiment, the MR3<sub>(-)eGFP</sub> started to move  
220 out the original cell in the addition of NSvc4 at OD<sub>600</sub> 0.025, compared with that in  
221 the leaves co-expressing MR3<sub>(-)eGFP</sub>, NP and RdRp<sub>opt</sub> without NSvc4 (Fig. 5A and  
222 Table 1). When the concentration of Agrobacterium culture carrying NSvc4 was  
223 further increased, stronger cell-to-cell movement of MR3<sub>(-)eGFP</sub> was observed (Fig. 5A  
224 and Table 1). Results of the Western blot assays agreed with the microscopic  
225 observations (Fig. 5B).

226

### 227 **Development of an RSV antigenomic RNA3-based replicon system**

228 To develop an RSV antigenomic (ag) RNA-based mini-replicon, we replaced the NS3  
229 gene in the RNA3<sub>(+)-agRNA</sub> vector (RNA3<sub>(+)</sub>) with an *eGFP* gene to produce  
230 MR3<sub>(+)eGFP</sub> (Fig. 6A). We then transiently co-expressed MR3<sub>(+)eGFP</sub>, NP, RdRp<sub>opt</sub>, and  
231 four VSRs (NSs+P19-HcPro- $\gamma$ b) in *N. benthamiana* leaves through agro-infiltration.  
232 By 5 dpi, no eGFP fluorescence was observed in the infiltrated leaves. In contrast,  
233 strong eGFP fluorescence was observed in the leaves co-expressing MR3<sub>(-)eGFP</sub>, NP,  
234 RdRp<sub>opt</sub> and four VSRs (Fig. 6B), indicating that the MR3<sub>(+)eGFP</sub> min-replicon is  
235 incapable of expressing eGFP in plant cells.

236 Next, we replaced the NS3 gene in MR3<sub>(-)eGFP</sub> with a *mCherry* gene  
237 (MR3<sub>(-)mCherry&eGFP</sub>) (Fig. 6C), and co-expressed MR3<sub>(-)mCherry&eGFP</sub> or MR3<sub>(-)eGFP</sub> with  
238 NP, RdRp<sub>opt</sub> and four VSRs in *N. benthamiana* leaves through agro-infiltration. By 5  
239 dpi, in contrast to the leaves co-expressing MR3<sub>(-)eGFP</sub>, NP, RdRp<sub>opt</sub> and VSRs, no

240 eGFP fluorescence was observed for MR3<sub>(-)mCherry&eGFP</sub> (Fig. 6D), indicating that  
241 without the *NS3* gene, this MR3<sub>(-)mCherry&eGFP</sub> min-replicon is unable to express eGFP  
242 in *N. benthamiana* leaf cells. To confirm this result, we generated RNA3<sub>(+)</sub> to express  
243 full-length RSV agRNA3 (Fig. 6A), and transiently co-expressed RNA3<sub>(+)</sub>, VSRs,  
244 NSvc4 with one or two of the three plasmids (i.e., Vec, NP and RdRp<sub>opt</sub>), respectively  
245 in *N. benthamiana* leaves via agro-infiltration. The infiltrated leaves were harvested at  
246 5 dpi and analyzed for the accumulations of RNA3<sub>(+)</sub>-derived gRNA3 and agRNA3  
247 through Northern blot assays using DIG labelled antisense- and sense-probes,  
248 respectively. The result showed that high levels of gRNA3 and agRNA3 were  
249 detected in the leaves co-expressing RNA3<sub>(+)</sub>, NP, RdRp<sub>opt</sub>, VSRs and NSvc4 (Fig.  
250 6E). In contrast, No amplified gRNA3 and agRNA3 were detected in the leaves  
251 co-expressing RNA3<sub>(+)</sub>, four VSRs, NSvc4 with Vec, NP or RdRp<sub>opt</sub> only) (Fig. 6E).  
252 Only primary transcripts of agRNA3 from RNA3<sub>(+)</sub> was detected in these leaves.  
253 Based on these results, we conclude that the RNA3<sub>(+)</sub> replicon is functional in *N.*  
254 *benthamiana* in the presence of NP, RdRp<sub>opt</sub>, NSs, P19-HcPro- $\gamma$ b and NSvc4.

255

### 256 **The *NS3* gene is required for eGFP expression from MR3<sub>(-)eGFP</sub>**

257 To investigate the function of *NS3* in eGFP expression from the MR3<sub>(-)eGFP</sub>  
258 mini-replicon, we introduced a stop codon (TAA) at the downstream of the start  
259 codon of *NS3* ORF (MR3<sub>(-)eGFP&NS3stop</sub>) (Fig. 7A), and co-expressed it with NP,  
260 RdRp<sub>opt</sub> and VSRs in *N. benthamiana* leaves through agroinfiltration. By 5 dpi, strong  
261 eGFP fluorescence was observed in the infiltrated leaves, while the leaves

262 co-expressing MR3<sub>(-)eGFPΔNS3</sub>, NP, RdRp<sub>opt</sub> and VSRs did not (Fig. 7B). Western blot  
263 results showed that the eGFP were expressed in the leaves co-expressing  
264 MR3<sub>(-)eGFP&NS3stop</sub>, NP, RdRp<sub>opt</sub> and VSRs, while no eGFP was accumulated in the  
265 leaves co-expressing MR3<sub>(-)eGFPΔNS3</sub>, NP, RdRp<sub>opt</sub> and VSRs (Fig. 7C). This finding  
266 indicates that the NS3 is dispensable for eGFP expression from the MR3<sub>(-)eGFP</sub>  
267 mini-replicon. Deletion of NS3 gene sequence from MR3<sub>(-)eGFP</sub> (MR3<sub>(-)eGFPΔNS3</sub>)  
268 abolished the expression of eGFP.

269 To further confirm the role of NS3 ORF in MR3<sub>(-)eGFP</sub> expression, we divided  
270 NS3 ORF into four segments and generated four truncated MR3<sub>(-)eGFP</sub> mutant  
271 constructs: MR3<sub>(-)eGFPMut1</sub>, MR3<sub>(-)eGFPMut2</sub>, MR3<sub>(-)eGFPMut3</sub>, and MR3<sub>(-)eGFPMut4</sub> (Fig. 7D).  
272 Each mutant was co-expressed with NP, RdRp<sub>opt</sub>, NSvc4 and VSRs, respectively, in *N.*  
273 *benthamiana* leaves. By 5 dpi, eGFP fluorescence was observed in the leaves  
274 co-expressing MR3<sub>(-)eGFPMut2</sub>, MR3<sub>(-)eGFPMut3</sub>, or MR3<sub>(-)eGFPMut4</sub> with NP, RdRp<sub>opt</sub>,  
275 NSvc4 and VSRs. However, the leaves co-expressing MR3<sub>(-)eGFPMut1</sub>, NP, RdRp<sub>opt</sub>,  
276 NSvc4 and VSRs did not show eGFP fluorescence (Fig. 7E). Western blot results  
277 agreed with the microscopic observations and showed that eGFP was not expressed  
278 from MR3<sub>(-)eGFPMut1</sub> in cells (Fig. 7F), indicating that deletion of the first 159 aa  
279 residues of NS3 significantly affect MR3<sub>(-)eGFP</sub> mini-replicon to express the eGFP. It is  
280 noteworthy that the Northern blot result showed that the expression of gRNA and  
281 agRNA from MR3<sub>(-)eGFPMut1</sub> was not affected (Fig. 7G). We also noticed that the  
282 mobility of gRNA and agRNA from MR3<sub>(-)eGFPMut2</sub> and MR3<sub>(-)eGFPMut4</sub> was altered  
283 compared with that from MR3<sub>(-)eGFPMut1</sub>, MR3<sub>(-)eGFPMut3</sub> or MR3<sub>(-)eGFP</sub>. Therefore, we

284 conclude that the *NS3* ORF sequence is not necessary for viral replication but is  
285 required for the expression of eGFP from the RNA<sub>3(-)</sub>-derived mini-replicons in cells.

286 RSV RNA2, 3 and 4 IGRs can form secondary hairpin-like structures which is  
287 postulated to act as transcription termination signals (24, 25). To further investigate  
288 the possible role of RSV NS3 in viral transcription regulation, we predicted the RNA  
289 secondary structure and examined the possible RNA-RNA interaction between NS3  
290 coding sequence, IGR and 3'-UTR of RSV RNA3. The 3'-UTR, NS3, and IGR of  
291 RSV RNA3 have 65, 636 and 742 nucleotides (nt), respectively. The secondary  
292 structure analysis showed that the 1-295 nt sequence of IGR formed a very long  
293 hairpin structure (Fig. 8). Strikingly, the 1-40 nt coding region sequence of NS3  
294 base-paired with the 575-596 nt sequence of IGR and the 1-65 nt sequence of 3'-UTR  
295 and formed a long hairpin structure (Fig. 8). The 619-636 nt coding region sequence  
296 of NS3 base-paired with the 396-403 nt and the 537-543 nt sequences of IGR and  
297 formed a small hairpin-like structure. The 41-203 nt coding region sequence of NS3  
298 itself formed four long and short hairpin structures. The 205-618 nt coding region  
299 sequence of NS3 formed sector structure containing at least 9 hairpins (Fig. 8). The  
300 secondary structure analysis suggested that the coding sequence of NS3 likely  
301 interacts with IGR and 3'-UTR of RNA3 in forming hairpin-like structure.

302

### 303 **Development of RSV RNA1, RNA2 and RNA4 mini-replicons**

304 RSV genome consists of four RNA segments encoding seven proteins using an  
305 antisense or an ambisense coding strategy (15-18). Because the MR<sub>3(-)</sub>eGFP

306 mini-replicon is functional in *N. benthamiana* leaf cells (Fig. 1 and Fig. 2), we  
307 decided to develop mini-replicons for other three RSV genomic RNAs. We first  
308 produced MR1<sub>(-)eGFP</sub> and then replaced the *RdRp* ORF with the *eGFP* gene to produce  
309 MR1<sub>(-)eGFP</sub> (Fig. 9A). For RSV genomic RNA2 and 4, we first cloned the full-length  
310 RNA2 or 4 segments individually into the vector, and then replaced the *NSvc2* ORF  
311 with the *eGFP* gene to produce MR2<sub>(-)eGFP</sub> or replaced the *NSvc4* ORF with the *eGFP*  
312 gene to produce MR4<sub>(-)eGFP</sub> (Fig. 9A). *N. benthamiana* leaves were then infiltrated  
313 with the mixed *Agrobacterium* cultures carrying various combinations of plasmids  
314 (Fig. 9B). By 5 dpi, strong eGFP fluorescence was observed in the leaves  
315 co-expressing MR1<sub>(-)eGFP</sub>, MR2<sub>(-)eGFP</sub>, or MR4<sub>(-)eGFP</sub> with NP, RdRp<sub>opt</sub> and four VSRs  
316 (Fig. 9B). As expected, the leaves infiltrated with the mixed *Agrobacterium* cultures  
317 lacking NP, RdRp<sub>opt</sub> or NP+RdRp<sub>opt</sub> did not show eGFP fluorescence.

318 Collectively, the mini-replicon-based reverse-genetics system, representing all  
319 four RSV genomic RNAs, has been created.

320

## 321 Discussion

322 There are 3 genera of segmented NSR viruses infecting plants: *Orthospovirus*,  
323 *Tenuivirus* and *Emaravirus*. The reverse-genetics systems have been established for  
324 TSWV and RRV in the genera *Orthospovirus* and *Emaravirus* (9, 48, 49),  
325 respectively. Here, we established a mini-replicon-based reverse-genetics system for  
326 RSV, the representative virus for the genus *Tenuivirus*. RSV is an important rice virus  
327 and poses significant threat to rice productions in China and many other Asian  
328 countries (6, 10, 11). During the past 20 years, the lack of a reliable reverse-genetics

329 system significantly hampered the studies of RSV gene functions and disease  
330 induction in plant. To overcome this obstacle, we launched a multiyear research that  
331 finally yielded a functional mini-replicon-based reversed genetics system for RSV  
332 studies. We first developed a mini-replicon system to express RSV MR3<sub>(-)eGFP</sub>, NP,  
333 and a codon usage optimized RdRp (RdRp<sub>opt</sub>), respectively. Using this mini-replicon  
334 systems we determined that RSV NP and RdRp<sub>opt</sub> are indispensable for the eGFP  
335 expression from MR3<sub>(-)eGFP</sub>. The expression of eGFP from MR3<sub>(-)eGFP</sub> was  
336 significantly enhanced in the presence of NSs and P19-HcPro- $\gamma$ b. In addition, NSvc4,  
337 the movement protein of RSV, facilitated eGFP trafficking between cells. Interestingly,  
338 co-expression of RSV NS3 inhibited eGFP expression from MR3<sub>(-)eGFP</sub>. We also found  
339 that the RSV *NS3* gene sequence is not necessary for viral replication, but regulates  
340 viral RNA expression. The secondary structure analysis showed that the coding  
341 sequence of NS3 base-paired with the sequence of IGR and 3'-UTR of RNA3 to form  
342 a long hairpin structure. The phenomenon of coding sequence as a *cis*-element in  
343 regulating viral RNA expression has not been reported previously for the  
344 negative-stranded/ambisense RNA viruses. Finally, based on the system of RNA3<sub>(-)</sub>,  
345 we have also produced mini-replicons representing all RSV RNA genomic segments,  
346 allowing RSV functional studies in plant.

347       The choice of promoter for RNA transcriptions is critical for the development of  
348 reverse-genetics systems for plant NSR viruses. The genomic and antigenomic RNAs  
349 generated from the negative-stranded RNA virus clones were not infectious because  
350 their infectious ribonucleoprotein complexes (RNPs) contain not only viral gRNA,



351 but also NP and RdRp proteins (36, 51). Genomic RNAs of the same segmented NSV  
352 contain highly conserved 5' and 3' terminal untranslated sequences that have eight  
353 complementary nucleotides, capable of forming panhandle-like structures. These  
354 structures are known to play critical roles in viral gRNA and agRNA replications (51).  
355 Moreover, the NSR viruses RNAs do not possess 5' cap-structures and 3' poly(A) tails.  
356 The classical bacteriophage T7 promoter can produce accurate viral RNA 5' end  
357 sequences without a cap. We initially produced an RSV mini-replicon systems using  
358 the T7 promoter. This mini-replicon system, however, did not express the *eGFP* gene  
359 from an RNA3-based mini-replicon in plant cells. In our recent report, we also  
360 reported that the T7 promoter-based system was unable to generate infectious TSWV  
361 RNA transcripts in plant cells (48). It is possible that the synthesis of viral genomic  
362 RNA transcripts through the T7 promoter and T7 RNA polymerase is incomplete or is  
363 inefficient in *planta*.

364 In a recent report, we described an expressing vector with a double CaMV 35S  
365 promoter (an RNA Pol II promoter), a hammerhead (HH) ribozyme, and an HDV  
366 ribozyme to produce infectious TSWV viral RNAs in plant cells (48). The  
367 mini-replicon system produced in this study also has an HH ribozyme and an HDV  
368 ribozyme before and after the viral sequence to ensure the correct ends. The results  
369 shown in [Fig. 1](#) and [Fig. 2](#) suggest that the vector transcribed RSV genomic RNA did  
370 bind to viral NP and RdRp to form functional RNPs, which is needed for the synthesis  
371 of functional viral gRNA and agRNA. This finding supports earlier reports that the  
372 Pol II promoter can not only replicate non-segmented plant NSR viruses (44, 46), but

373 also segmented plant NSR viruses (9, 48).

374 RSV RdRp is one of the major components needed for the initiation of viral  
375 genomic RNA replication (17). RSV RdRp is a 337 kDa protein. When this protein  
376 was co-expressed with the mini-replicon in plant cells, no eGFP fluorescence was  
377 observed in the infiltrated leaves (Fig. 1A-C). Our computer prediction suggested that  
378 the RSV *RdRp* sequence contained many putative cryptic intron splicing sites.  
379 Because the segmented plant NSR viruses replicate in cytoplasm, their *RdRp* gene  
380 sequences should not be evolved to remove those cryptic intron splicing sites that  
381 could be spliced in cell nucleus. We speculated that after the wild-type RSV *RdRp*  
382 sequences were expressed, through the 2×35S promoter, in nucleus, they were quickly  
383 spliced, resulting in non-functional *RdRp* fragments. After the putative intron splicing  
384 sites were removed and the codon usage was optimized, the expressed RdRp<sub>opt</sub> is  
385 capable of supporting *eGFP* expression from the mini-replicon (Fig. 1D). In this study,  
386 we also determined that the less concentrated *Agrobacterium* culture carrying RdRp<sub>opt</sub>  
387 (OD<sub>600</sub> 0.05) caused higher eGFP expression in cells. In contrast, increase of  
388 *Agrobacterium* culture carrying RdRp<sub>opt</sub> from OD<sub>600</sub> 0.1 to OD<sub>600</sub> 0.4 decreased eGFP  
389 expression from the mini-replicon (Fig. 4B and 4C), suggesting that an optimum  
390 concentration of RdRp<sub>opt</sub> is required during RSV infection in plant.

391 Analyses of the five different VSRs have indicated that in the presence of NSs or  
392 P19-HcPro-γb, the eGFP expression from the mini-replicon was significantly  
393 enhanced (Fig. 3B and 3C). These VSRs are known to function at different steps in  
394 host RNA interference (RNAi) pathway during virus infection in plant (44, 52).

395 Consequently, we conclude that these steps in the RNAi pathway can all affect eGFP  
396 expression from the mini-replicon. It is noteworthy that the presence of RSV NS3  
397 alone or NS3 plus one or three of the four VSRs (i.e., NSs or P19-HcPro- $\gamma$ b)  
398 suppressed eGFP expression from the RNA3 mini-replicon (3B and 3C) suggesting  
399 that RSV NS3 is a negative regulator of RSV RNA3 mini-replicon expression. Similar  
400 phenomenon was also reported for TSWV NSs during virus rescue assays using  
401 cDNA clones (48). We hypothesize that this negative regulation is caused by the  
402 co-suppression of *NS3* gene expression. In this study, addition of NSvc4 significantly  
403 increased the number of cells with eGFP fluorescence (Fig. 5A and 5B), further  
404 conforming its role in cell-to-cell trafficking.

405 When the *NS3* gene was replaced with a *mCherry* gene (MR3<sub>(-)mCherry&eGFP</sub>) or  
406 with an *eGFP* gene in MR3<sub>(+)eGFP</sub>, no mCherry or eGFP fluorescence was observed in  
407 the leaf tissues co-expressing NP, RdRp<sub>opt</sub> and VSRs (Fig. 6C and 6D). Deletion of  
408 the *NS3* gene sequence abolished the function of MR3<sub>(-)eGFP</sub>. However, gRNA and  
409 agRNA were detected in the leaves co-expressing RNA3<sub>(+)</sub>, NP, RdRp<sub>opt</sub>, NSvc4 and  
410 VSRs (Fig. 6A and 6E). The MR3<sub>(-)eGFP&NS3stop</sub> mini-replicon contains a translation  
411 stop codon immediately after the start codon of NS3 and is still functional in *N.*  
412 *benthamiana* leaves (Fig. 7A, 7B and 7C). This finding suggests that the *NS3* coding  
413 sequence is required for the eGFP expression of the mini-replicon, probably required  
414 for viral transcription. Through nucleotide deletion assays, we determined that the  
415 region encompassing nt 1-477 in the *NS3* ORF is not sufficient to express eGFP from  
416 the MR3<sub>(-)eGFP</sub> mini-replicon (Fig. 7D, and 7E-G), even though the mutant

417 mini-replicon (MR3<sub>(-)eGFPMut1</sub>) is capable of expressing RNA in cells, based on the  
418 Northern blot results. Because the positions of the gRNA and agRNA bands from  
419 MR3<sub>(-)eGFPMut2</sub> and MR3<sub>(-)eGFPMut4</sub> were altered, we speculate that the *NS3* ORF  
420 sequence may act as a *cis*-regulatory element during RSV RNA3 viral transcription.  
421 Importantly, the secondary structure analysis suggested that the coding sequence of  
422 *NS3* interacts with IGR and 3'-UTR to form a hairpin-like structure and *NS3* itself  
423 also forms sophisticated hairpin-like structure (Fig 8). Hairpin structure of TSWV and  
424 RSV IGR have been shown to regulate viral transcription termination (53). This is  
425 consistent with our findings that *NS3* coding sequence involved in regulation of viral  
426 RNA transcription. In our earlier studies, deletion of *NSs* coding sequence from the  
427 TSWV S-based mini-replicon system had no clear effect on RNA synthesis (48).  
428 Although the genome structure of RSV RNA3 is similar to that of TSWV S RNA, this  
429 is the first evidence showing that the *NS3* coding region can act as *cis*-element to  
430 regulate the synthesis of viral RNA transcripts of plant segmented NSR viruses.

431 Based the established mini-replicon system for MR3<sub>(-)eGFP</sub>, we have also  
432 produced mini-replicons to express MR1<sub>(-)eGFP</sub>, MR2<sub>(-)eGFP</sub>, and MR4<sub>(-)eGFP</sub> as  
433 described in (Fig. 9A). In the presence of NP, RdRp<sub>opt</sub> and VSRs, eGFP was expressed  
434 from MR1<sub>(-)eGFP</sub>, MR2<sub>(-)eGFP</sub>, and MR4<sub>(-)eGFP</sub> mini-replicons, respectively (Fig. 9B).  
435 We also constructed full-length infectious cDNA clones representing RSV genomic  
436 RNA1, RNA2 and RNA4. Infiltration of *N. benthamiana* leaves with the mixed  
437 Agrobacterium culture carrying RNA1<sub>(-)</sub>, RNA2<sub>(-)</sub>, RNA3<sub>(-)</sub>, RNA4<sub>(-)</sub> and  
438 NP+RdRp<sub>opt</sub>+VSRs did not yield a systemic infection. Because *N. benthamiana* is an

439 experimental host of RSV and the accumulations of RSV RNAs and proteins are  
440 lower than that in the rice plants, it is possible that the low level of RSV RNAs and  
441 proteins in the infiltrated *N. benthamiana* leaves fails to rescue of RSV systemic  
442 infection. It is also possible that the difficulty of delivering four RSV RNA segments  
443 into the same cells prevents the systemic infection. We have also infiltrated rice callus  
444 tissues with the mixed *Agrobacterium* culture carrying MR1<sub>(-)eGFP</sub>, MR2<sub>(-)eGFP</sub>,  
445 MR3<sub>(-)eGFP</sub>, MR4<sub>(-)eGFP</sub> and NP+RdRp<sub>opt+</sub>+VSRs, none of them work in rice callus  
446 tissues.

447 In conclusion, there are 3 genera of segmented NSR viruses infecting plants and  
448 the replicon-based reverse-genetics system has been established for 2 genera. We now  
449 established a mini-replicon-based reverse-genetics system for a tenuivirus in *N.*  
450 *benthamiana*. This is the first mini-replicon-based reverse-genetics system for the  
451 segmented monocot-infecting tenuivirus, and will provide a useful platform for  
452 studies of RSV gene functions during viral replication, cell-to-cell movement and  
453 interactions between RSV and host factors in plants. Knowledge learned from this  
454 study also benefit the future constructions of full-length multi-segmented infectious  
455 clones for tenuivirus in plants.

456

## 457 **Materials and Methods**

458

### 459 **Plant growth and virus source.**

460 *Nicotiana benthamiana* plants were grown inside a growth chamber maintained at  
461 25°C and a 16/8 h light and dark photoperiod, and used for assays at about 7-leaf

462 stage. RSV was originally isolated from an RSV-infected rice plant as reported (12).  
463 Optimization of RSV *RdRp* ORF codon usage and deletion of putative intron splicing  
464 sites were performed based on the predictions using the GeneArt™ Project Manager  
465 online software (<https://www.thermofisher.com/order/geneartgenes/projectmgmt>).

466

#### 467 **Plasmid construction**

##### 468 ***Constructions of RSV RdRp, RdRp<sub>opt</sub>, NP, NSvc4, NS3 and VSRs mini-replicons.***

469 Complementary DNAs (cDNAs) of *RSV*, *NP*, *RdRp*, *RdRp<sub>opt</sub>*, *NS3* and *NSvc4* gene  
470 were individually amplified from a total RNA sample isolated from an RSV-infected  
471 rice plant through reverse transcription polymerase chain reaction (RT-PCR) using  
472 gene specific primers. The resulting RT-PCR products were inserted individually into  
473 the expression vector pCambia2300 (refers to as p2300 thereafter), pBINplus, or  
474 pCXSN to generate p2300-RdRp<sub>wt</sub>, pBIN-NS3, p2300-NP and pCXSN-NSvc4,  
475 respectively. The pCXSV-NSs vector was constructed by inserting a NSs fragment  
476 amplified from a cDNA from a TSWV-infected *N. benthamiana* plant into the pCXSN  
477 vector. Plasmid pCB301-P19-HcPro-γb (P19-HcPro-γb) that can simultaneously  
478 expresses the *Tomato bushy stunt virus* P19 protein, the *Tobacco etch virus* HcPro  
479 protein, and the *Barley stripe mosaic virus* γb protein is from a previously published  
480 source (46). To construct p2300-RdRp<sub>opt</sub>, we first optimized RdRp<sub>wt</sub> codon usage and  
481 deleted the putative intron splicing sites in it at the GenScript Biotech Corp (Nanjing,  
482 China) followed by inserting the synthesized sequence into the p2300 vector to  
483 produce p2300-RdRp<sub>opt</sub> (RdRp<sub>opt</sub>).

484 ***Constructions of MR3<sub>(-)eGFP</sub>, MR3<sub>(-)mCherry&eGFP</sub> and MR3<sub>(+)eGFP</sub> mini-replicons.*** To

485 generate the MR3<sub>(-)eGFP</sub> and the MR3<sub>(+)eGFP</sub> mini-replicons, we first prepared cDNAs  
486 from a total RNA sample isolated from an RSV-infected rice plant using the Reverse  
487 Transcription Kit as instructed (Promega, Madison, WI, USA). We then amplify the  
488 full-length RSV RNA3<sub>(-)</sub> and RNA3<sub>(+)</sub> sequences from this cDNA through PCR using  
489 RSV RNA3 specific primers (Table S1) and a Phanta Super-Fidelity DNA Polymerase  
490 (Vazyme Biotech, Nanjing, China). Both PCR products contained a hammerhead (HH)  
491 ribozyme (54) before the 5' end, and then cloned individually behind the 2×35S  
492 promoter in the pCB301-2×35S-RZ-NOS vector to generate  
493 pCB301-2×35S-HH-RNA3<sub>(-)</sub>-RZ-NOS (refers to as RNA3<sub>(-)</sub>) or  
494 pCB301-2×35S-HH-RNA3<sub>(+)</sub>-RZ-NOS (RNA3<sub>(+)</sub>). The presence of an HH and a  
495 Hepatitis delta virus ribozyme (RZ) in these two vectors allow the productions of  
496 RNA3<sub>(-)</sub> and RNA3<sub>(+)</sub> with near perfect ends. To produce a MR3<sub>(-)eGFP</sub> and a  
497 MR3<sub>(+)eGFP</sub> mini-replicon, we first amplified the *eGFP* gene from SR<sub>(+)eGFP</sub> (48) using  
498 primer FMF37 and FMF38, and then used it to replace the *NP* gene in the RNA3<sub>(-)</sub>  
499 and RNA3<sub>(+)</sub> through *in vitro* homologous recombination using a ClonExpress II One  
500 Step Cloning Kit (Vazyme Biotech, Nanjing, China). The resulting plasmids were  
501 referred to as MR3<sub>(-)eGFP</sub> and MR3<sub>(+)eGFP</sub>, respectively. To produce an  
502 MR3<sub>(-)mCherry&eGFP</sub> min-replicon with both *mCherry* and *eGFP* gene, we  
503 PCR-amplified the *mCherry* gene from the TSWV SR<sub>(-)mCherry&eGFP</sub> mini-replicon as  
504 reported previously (48) using primer FMF267 and FMF269, and used it to replace  
505 the *NS3* gene in MR3<sub>(-)eGFP</sub> through homologous recombination as describe above. All  
506 primers used in this study are listed in Table S1.

507 **Constructions of mutant MR3<sub>(-)eGFP mini-replicons.</sub>** To produce these mutant  
508 mini-replicons, we first introduced a stop codon (TAA) after the original start codon  
509 of the *NS3* gene through PCR using MR3<sub>(-)eGFP</sub> as the template, and primer FMF528  
510 and FMF36. This NS3stop fragment was then used to replace the *NS3* gene in  
511 MR3<sub>(-)eGFP</sub> through homologous recombination using prime FMF40 and FMF529. The  
512 resulting plasmid is named as MR3<sub>(-)eGFP&NS3stop</sub>. We then deleted a 636 nucleotides  
513 (nt) fragment from the *NS3* gene in MR3<sub>(-)eGFP</sub> through PCR using primer LLY40 and  
514 FMF42, and then inserted it into the pCB301 vector through homologous  
515 recombination using prime FMF37 and LLY105 to produce MR3<sub>(-)eGFPΔNS3</sub>.

516 To further investigate the role of RSV *NS3* gene in viral RNA replication and  
517 transcription from RNA3<sub>(-)</sub>, we divided *NS3* ORF into four fragments and amplified  
518 them individually through PCR using specific primers. These four fragments are:  
519 nucleotide position 1-159, 160-318, 319-477, and 478-636, respectively. These  
520 fragments were then used to generate MR3<sub>(-)eGFPMut1</sub>, MR3<sub>(-)eGFPMut2</sub>, MR3<sub>(-)eGFPMut3</sub>,  
521 and MR3<sub>(-)eGFPMut4</sub>, respectively. Primers used in this study are listed in [Table S1](#). The  
522 plasmids were transformed individually into *Agrobacterium tumefaciens* strain  
523 GV3101 through electroporation, and the transformants are maintained at -80°C until  
524 use.

525

## 526 **Agrobacterium infiltration**

527 *A. tumefaciens* culture were prepared as described previously (44, 45). Briefly,  
528 agrobacterium cultures carrying specific plasmids were grown individually in a



529 culture medium and then diluted to  $OD_{600} = 1.0$ , or as indicated in the text, in an  
530 infiltration buffer (10 mM MES and 10 mM  $MgCl_2$ , pH 5.6, supplemented with 100  
531  $\mu$ M acetosyringone). After 2-3 h incubation in the dark and at room temperature (RT),  
532 *Agrobacterium* cultures harboring p2300-NP ( $OD_{600} = 0.2$ ), p2300-RdRp ( $OD_{600} =$   
533 0.05), p2300-NSs ( $OD_{600} = 0.1$ ), pCB301-P19-HcPro- $\gamma$ b ( $OD_{600} = 0.1$ ) or one of the  
534 vectors ( $OD_{600} = 0.2$  each) with an *eGFP* and/or an *mCherry* report gene were mixed  
535 in equal volumes, or as indicated in the text. The mixed cultures were then infiltrated  
536 individually into leaves of 6-7 leaf-stage-old *N. benthamiana* plants using 1 mL  
537 needleless syringes. The infiltrated plants were grown inside a growth chamber with the  
538 same growth conditions as described above.

539

#### 540 **Western blot assay**

541 The agro-infiltrated *N. benthamiana* leaves were harvested at 5 days post  
542 agro-infiltration (dpi) and homogenized (1 mg/sample) individually in 1 mL  
543 extraction buffer (150 mM NaCl, 25 mM Tris-HCl, pH 7.5, 1 mM EDTA, 2%  
544 polyvinylpyrrolidone, 10 mM dithiothreitol, 10% glycerol, 0.5% Triton X-100,  
545 and 1 $\times$  protease inhibitor cocktail reagent). The crude extract from each sample was  
546 mixed with a 5 $\times$  loading buffer at a 1:4 ratio (v/v). All the samples were boiled  
547 for 10 min and then incubated on ice for 5 min followed by electrophoresis in 12%  
548 SDS-PAGE gels. After the protein bands were transferred onto PVDF membranes  
549 (GE Healthcare, UK), the blots were probed with an RSV NP specific (1:5000 diluted)  
550 or an eGFP specific (1:3000 diluted) antibody followed by a horseradish peroxidase

551 (HRP)-conjugated goat anti-mouse or anti-rabbit secondary antibody (1:10000  
552 diluted). The detection signal was visualized using the ECL Substrate Kit as instructed  
553 (Thermo Fisher Scientific, Rockford, USA). The ponceau S-stained Rubisco large  
554 subunit gels were used to show sample loadings.

555

#### 556 **Northern blot assay**

557 To detect the expressions of RSV gRNAs, agRNAs, and *eGFP* mRNA, we isolated  
558 total RNA from the agro-infiltrated *N. benthamiana* leaf tissues using the RNAprep  
559 Pure Plant Kit (Tiangen Biotech, Beijing, China). The isolated total RNA samples  
560 were separated in 1% formaldehyde agarose gels through electrophoresis, and then  
561 transferred onto Hybond-N<sup>+</sup> membranes (GE Healthcare, UK) (55). DIG-labeled  
562 RNA probes specific for the sense or antisense *eGFP* mRNA were *in vitro* synthesized  
563 using the DIG High Prime RNA labeling kit (Roche, Basel, Switzerland). The blotted  
564 membranes were probed with DIG-labeled RNA probes specific for the sense or  
565 antisense *eGFP* mRNA. The detection signal was visualized using a DIG-High Prime  
566 Detection Starter Kit II as instructed (Roche).

567

#### 568 **Fluorescence microscopy**

569 The agro-infiltrated *N. benthamiana* leaf tissues were harvested at 5 dpi, and  
570 examined under an inverted fluorescence microscope (OLYMPUS IX71-F22FL/DIC,  
571 Tokyo, Japan) equipped with a green barrier filter. The captured images were  
572 processed using the ImagePro system (OLYMPUS, Tokyo, Japan) and then the Adobe

573 Photoshop CS4 (San Jose, CA, USA).

574

### 575 **Acknowledgments**

576 This work was supported by the National Natural Science Foundation of China  
577 (31630062, 31925032 and 31870143), the Fundamental Research Funds for the  
578 Central Universities (JCQY201904 and KYXK202012), Youth Science and  
579 Technology Innovation Program to XT, Project funded by China Postdoctoral Science  
580 Foundation (2020M681643) to MF.

581

### 582 **Author contributions**

583 M.F., L.L. and X.T. conceived and designed the experiments and M.Y., Y.Z., J.W. and  
584 Y.X. provided input. M.F., L.L., R.C., Y.Y., Y.D., M.C., and G.R. performed the  
585 experiments. M.F., X.D., X.Z. and X.T. wrote the manuscript.

586

### 587 **Competing interests:**

588 The authors declare that no competing interests exist.

589

### 590 **Data availability**

591 All data produced in this study are presented in this manuscript or as the supporting  
592 files.

593

### 594 **References**

595 1. Fields BN, Knipe, D. M., & Howley, P. M. 1996. Fields Virology (Lippincott-Raven, New

- 596 York).
- 597 2. **Elliott RM B, G.** 2011. Molecular Biology of Orthobunyaviruses. In: Plyusnin, A., Elliott,  
598 R.M. (Eds.), The Bunyaviridae: Molecular and Cellular Biology. Horizon Scientific Press,  
599 Norwhich, UK.
- 600 3. **Scholthof KB, Adkins S, Czosnek H, Palukaitis P, Jacquot E, Hohn T, Hohn B, Saunders**  
601 **K, Candresse T, Ahlquist P, Hemenway C, Foster GD.** 2011. Top 10 plant viruses in  
602 molecular plant pathology. *Mol Plant Pathol* **12**:938-954.
- 603 4. **Kong LF, Wu JX, Lu LN, Xu Y, Zhou XP.** 2014. Interaction between Rice stripe virus  
604 disease-specific protein and host PsbP enhances virus symptoms. *Mol Plant* **7**:691-708.
- 605 5. **Laney AG, Keller KE, Martin RR, Tzanetakis IE.** 2011. A discovery 70 years in the  
606 making: characterization of the Rose rosette virus. *J Gen Virol* **92**:1727-1732.
- 607 6. **Falk BW, Tsai JH.** 1998. Biology and molecular biology of viruses in the genus Tenuivirus.  
608 *Annu Rev Phytopathol* **36**:139-163.
- 609 7. **Zhu M, Jiang L, Bai BH, Zhao WY, Chen XJ, Li J, Liu Y, Chen ZQ, Wang BT, Wang**  
610 **CL, Wu Q, Shen QH, Dinesh-Kumar SP, Tao XR.** 2017. The intracellular immune receptor  
611 Sw-5b confers broad-spectrum resistance to tospoviruses through recognition of a conserved  
612 21-amino acid viral effector epitope. *Plant Cell* **29**:2214-2232.
- 613 8. **Mielke N, Muehlbach HP.** 2007. A novel, multipartite, negative-strand RNA virus is  
614 associated with the ringspot disease of European mountain ash (*Sorbus aucuparia* L.). *J Gen*  
615 *Virol* **88**:1337-1346.
- 616 9. **Verchot J, Herath V, Urrutia CD, Gayral M, Lyle K, Shires MK, Ong K, Byrne D.** 2020.  
617 Development of a reverse genetic system for studying rose rosette virus in whole plants. *Mol*  
618 *Plant Microbe Interact* **33**:1209-1221.
- 619 10. **Otuka A, Matsumura M, Sanada-Morimura S, Takeuchi H, Watanabe T, Ohtsu R, Inoue**  
620 **H.** 2010. The 2008 overseas mass migration of the small brown planthopper, *Laodelphax*  
621 *striatellus*, and subsequent outbreak of rice stripe disease in western Japan. *Appl Entomol Zool*  
622 **45**:259-266.
- 623 11. **Wang HD, Chen JP, Zhang HM, Sun XL, Zhu JL, Wang AG, Sheng WX, Adams MJ.**  
624 2008. Recent rice stripe virus epidemics in zhejiang province, China, and experiments on  
625 sowing date, disease-yield loss relationships, and seedling susceptibility. *Plant Dis*  
626 **92**:1190-1196.
- 627 12. **Lu G, Li S, Zhou CW, Qian X, Xiang Q, Yang TQ, Wu JX, Zhou XP, Zhou YJ, Ding XS,**  
628 **Tao XR.** 2019. Tenuivirus utilizes its glycoprotein as a helper component to overcome insect  
629 midgut barriers for its circulative and propagative transmission. *PLoS Pathog* **15**:e1007655.
- 630 13. **Zhao W, Yang PC, Kang L, Cui F.** 2016. Different pathogenicities of Rice stripe virus from  
631 the insect vector and from viruliferous plants. *New Phytol* **210**:196-207.
- 632 14. **Toriyama S.** 1986. Rice stripe virus: prototype of a new group of viruses that replicate in  
633 plants and insects. *Microbiol Sci* **3**:347-351.
- 634 15. **Zhu Y, Hayakawa T, Toriyama S, Takahashi M.** 1991. Complete nucleotide sequence of  
635 RNA 3 of rice stripe virus: an ambisense coding strategy. *J Gen Virol* **72 ( Pt 4)**:763-767.
- 636 16. **Takahashi M, Toriyama S, Hamamatsu C, Ishihama A.** 1993. Nucleotide sequence and  
637 possible ambisense coding strategy of rice stripe virus RNA segment 2. *J Gen Virol*  
638 **74**:769-773.
- 639 17. **Toriyama S, Takahashi M, Sano Y, Shimizu T, Ishihama A.** 1994. Nucleotide sequence of

- 640 RNA 1, the largest genomic segment of rice stripe virus, the prototype of the tenuiviruses. *J*  
641 *Gen Virol* **75**:3569-3579.
- 642 18. **Xiong RY, Wu JX, Zhou YJ, Zhou XP.** 2008. Identification of a movement protein of the  
643 tenuivirus rice stripe virus. *J Virol* **82**:12304-12311.
- 644 19. **Du ZG, Xiao DL, Wu JG, Jia DS, Yuan ZJ, Liu Y, Hu LY, Han Z, Wei TY, Lin QY, Wu**  
645 **ZJ, Xie LH.** 2011. p2 of rice stripe virus (RSV) interacts with OsSGS3 and is a silencing  
646 suppressor. *Mol Plant Pathol* **12**:808-814.
- 647 20. **Yao M, Liu XF, Li S, Xu Y, Zhou YJ, Zhou XP, Tao XR.** 2014. Rice stripe tenuivirus  
648 NSvc2 glycoproteins targeted to the Golgi body by the n-terminal transmembrane domain and  
649 adjacent cytosolic 24 amino acids via the COP I- and COP II-dependent secretion pathway. *J*  
650 *Virol* **88**:3223-3234.
- 651 21. **Xiong RY, Wu JX, Zhou YJ, Zhou XP.** 2009. Characterization and subcellular localization  
652 of an RNA silencing suppressor encoded by Rice stripe tenuivirus. *Virology* **387**:29-40.
- 653 22. **Shen M, Xu Y, Jia R, Zhou X, Ye KQ.** 2010. Size-independent and noncooperative  
654 recognition of dsRNA by the Rice stripe virus RNA silencing suppressor NS3. *J Mol Biol*  
655 **404**:665-679.
- 656 23. **Lu G, Li J, Zhou YJ, Zhou XP, Tao XR.** 2017. Model-based structural and functional  
657 characterization of the Rice stripe tenuivirus nucleocapsid protein interacting with viral  
658 genomic RNA. *Virology* **506**:73-83.
- 659 24. **Muhlberger E, Lotfering B, Klenk HD, Becker S.** 1998. Three of four nucleocapsid  
660 proteins of Marburg virus, NP, VP35, and L, are sufficient to mediate replication and  
661 transcription of marburg virus-specific monocistronic minigenomes. *J Virol* **72**:8756-8764.
- 662 25. **Wu GT, Lu YW, Zheng HM, Lin L, Yan F, Chen JP.** 2013. Transcription of ORFs on RNA2  
663 and RNA4 of Rice stripe virus terminate at an AUCCGGAU sequence that is conserved in the  
664 genus Tenuivirus. *Virus Res* **175**:71-77.
- 665 26. **Neumann G, Whitt MA, Kawaoka Y.** 2002. A decade after the generation of a  
666 negative-sense RNA virus from cloned cDNA - what have we learned? *J Gen Virol*  
667 **83**:2635-2662.
- 668 27. **Jackson AO, Li ZH.** 2016. Developments in plant negative-strand RNA virus reverse  
669 genetics. *Annu Rev Phytopathol* **54**:469-498.
- 670 28. **Jackson AO, Dietzgen RG, Goodin MM, Li Z.** 2018. Development of model systems for  
671 plant rhabdovirus research. *Adv Virus Res* **102**:23-57.
- 672 29. **Chen YT, Dessau M, Rotenberg D, Rasmussen DA, Whitfield AE.** 2019. Entry of  
673 bunyaviruses into plants and vectors. *Adv Virus Res* **104**:65-96.
- 674 30. **Feng MF, Feng ZK, Li ZH, Wang XB, Tao, XB.** 2020. Advances in reverse genetics system  
675 of plant negative-strand RNA viruses (in Chinese). *Chin Sci Bull* **65**:4073-4083.
- 676 31. **German TL, Lorenzen MD, Grubbs N, Whitfield AE.** 2020. New technologies for studying  
677 negative-strand RNA viruses in plant and arthropod hosts. *Mol Plant Microbe Interact*  
678 **33**:382-393.
- 679 32. **Zang Y, Fang XD, Qiao JH, Gao Q, Wang XB.** 2020. Reverse genetics systems of plant  
680 negativestrand RNA viruses are difficult to be developed but powerful for virus-host  
681 interaction studies and virus-based vector applications. *Phytopathology Research* **2**:29-37.
- 682 33. **Dunn EF, Pritlove DC, Jin H, Elliott RM.** 1995. Transcription of a recombinant bunyavirus  
683 rna template by transiently expressed bunyavirus proteins. *Virology* **211**:133-143.

- 684 34. **Bridgen A, Elliott RM.** 1996. Rescue of a segmented negative-strand RNA virus entirely  
685 from cloned complementary DNAs. *Proc Natl Acad Sci U S A* **93**:15400-15404.
- 686 35. **Neumann G, Watanabe T, Ito H, Watanabe S, Goto H, Gao P, Hughes M, Perez DR,**  
687 **Donis R, Hoffmann E, Hobom G, Kawaoka Y.** 1999. Generation of influenza A viruses  
688 entirely from cloned cDNAs. *Proc Natl Acad Sci U S A* **96**:9345-9350.
- 689 36. **Pekosz A, He B, Lamb RA.** 1999. Reverse genetics of negative-strand RNA viruses: closing  
690 the circle. *Proc Natl Acad Sci U S A* **96**:8804-8806.
- 691 37. **Lee KJ, Novella IS, Teng MN, Oldstone MBA, de la Torre JC.** 2000. NP and L proteins of  
692 lymphocytic choriomeningitis virus (LCMW) are sufficient for efficient transcription and  
693 replication of LCMV genomic RNA analogs. *J Virol* **74**:3470-3477.
- 694 38. **Flick R, Pettersson RF.** 2001. Reverse genetics system for Uukuniemi virus (Bunyviridae):  
695 RNA polymerase I-catalyzed expression of chimeric viral RNAs. *J Virol* **75**:1643-1655.
- 696 39. **Flatz L, Bergthaler A, de la Torre JC, Pinschewer DD.** 2006. Recovery of an arenavirus  
697 entirely from RNA polymerase I/II-driven cDNA. *Proc Natl Acad Sci U S A* **103**:4663-4668.
- 698 40. **Luytjes W, Krystal M, Enami M, Parvin JD, Palese P.** 1989. Amplification, expression, and  
699 packaging of foreign gene by influenza virus. *Cell* **59**:1107-1113.
- 700 41. **Conzelmann KK, Schnell M.** 1994. Rescue of synthetic genomic RNA analogs of rabies  
701 virus by plasmid-encoded proteins. *J Virol* **68**:713-719.
- 702 42. **Volchkov VE, Volchkova VA, Muhlberger E, Kolesnikova LV, Weik M, Dolnik O, Klenk**  
703 **HD.** 2001. Recovery of infectious Ebola virus from complementary DNA: RNA editing of the  
704 GP gene and viral cytotoxicity. *Science* **291**:1965-1969.
- 705 43. **Neumann G, Whitt MA, Kawaoka Y.** 2002. A decade after the generation of a  
706 negative-sense RNA virus from cloned cDNA - what have we learned? *J Gen Virol*  
707 **83**:2635-2662.
- 708 44. **Ganesan U, Bragg JN, Deng M, Marr S, Lee MY, Qian S, Shi M, Kappel J, Peters C, Lee**  
709 **Y, Goodin MM, Dietzgen RG, Li Z, Jackson AO.** 2013. Construction of a sonchus yellow  
710 net virus minireplicon: a step toward reverse genetic analysis of plant negative-strand RNA  
711 viruses. *J Virol* **87**:10598-10611.
- 712 45. **Wang Q, Ma XL, Qian SS, Zhou X, Sun K, Chen XL, Zhou XP, Jackson AO, Li ZH.**  
713 2015. Rescue of a plant negative-strand RNA virus from cloned cDNA: insights into  
714 enveloped plant virus movement and morphogenesis. *PLoS Pathog* **11**:e1005223.
- 715 46. **Fang XD, Yan T, Gao Q, Cao Q, Gao DM, Xu WY, Zhang ZJ, Ding ZH, Wang XB.** 2019.  
716 A cytorhabdovirus phosphoprotein forms mobile inclusions trafficked on the actin/ER network  
717 for viral RNA synthesis. *J Exp Bot* **70**:4049-4062.
- 718 47. **Gao Q, Xu WY, Yan T, Fang XD, Cao Q, Zhang ZJ, Ding ZH, Wang Y, Wang XB.** 2019.  
719 Rescue of a plant cytorhabdovirus as versatile expression platforms for planthopper and cereal  
720 genomic studies. *New Phytol* **223**:2120-2133.
- 721 48. **Feng MF, Cheng RX, Chen ML, Guo R, Li LY, Feng ZK, Wu JY, Xie L, Hong J, Zhang**  
722 **ZK, Kormelink R, Tao XR.** 2020. Rescue of tomato spotted wilt virus entirely from  
723 complementary DNA clones. *Proc Natl Acad Sci U S A* **117**:1181-1190.
- 724 49. **Ishibashi K, Matsumoto-Yokoyama E, Ishikawa M.** 2017. A tomato spotted wilt virus S  
725 RNA-based replicon system in yeast. *Sci Rep* **7**:12647.
- 726 50. **Fu S, Xu Y, Li CY, Li Y, Wu JX, Zhou XP.** 2018. Rice stripe virus interferes with  
727 S-acylation of remorin and induces its autophagic degradation to facilitate virus infection. *Mol*

- 728 Plant **11**:269-287.
- 729 51. **Ferron F, Weber F, de la Torre JC, Reguera J.** 2017. Transcription and replication  
730 mechanisms of Bunyaviridae and Arenaviridae L proteins. *Virus Res* **234**:118-134.
- 731 52. **Burgyan J, Havelda Z.** 2011. Viral suppressors of RNA silencing. *Trends Plant Sci*  
732 **16**:265-272.
- 733 53. **van Knippenberg I, Goldbach R, Kormelink R.** 2005. Tomato spotted wilt virus S-segment  
734 mRNAs have overlapping 3'-ends containing a predicted stem-loop structure and conserved  
735 sequence motif. *Virus Res* **110**:125-131.
- 736 54. **Herold J, Andino R.** 2000. Poliovirus requires a precise 5' end for efficient positive-strand  
737 RNA synthesis. *J Virol* **74**:6394-6400.
- 738 55. **Feng MF, Zuo DP, Jiang XZ, Li S, Chen J, Jiang L, Zhou XP, Jiang T.** 2018. Identification  
739 of Strawberry vein banding virus encoded P6 as an RNA silencing suppressor. *Virology*  
740 **520**:103-110.
- 741
- 742
- 743

744 **Table 1.** RSV NSvc4 enhances the cell-to-cell movement of MR3<sub>(-)eGFP</sub>  
745 mini-replicon in the presence of NP, RdRp<sub>opt</sub> and four VSRs.

| NSvc4 <sup>a</sup><br>OD <sub>600</sub> | Total eGFP<br>fluorescent cells | No. of clusters with<br>1 cell (% of total) | No. of clusters with<br>2 cells (% of total) | No. of clusters with<br>3≥cells (% of total) |
|-----------------------------------------|---------------------------------|---------------------------------------------|----------------------------------------------|----------------------------------------------|
| 0                                       | 18                              | 18 (100%) <sup>b</sup>                      | 0 (100)                                      | 0 (100)                                      |
| 0.025                                   | 54                              | 15 (27.8%)                                  | 6 (22.2%)                                    | 5 (50%)                                      |
| 0.05                                    | 76                              | 12 (15.8%)                                  | 7 (18.4%)                                    | 10 (65.8%)                                   |
| 0.1                                     | 95                              | 8 (8.4%)                                    | 11 (23.2%)                                   | 13 (68.4%)                                   |
| 0.15                                    | 140                             | 17 (12.1%)                                  | 9 (12.9%)                                    | 18 (75%)                                     |

746 <sup>a</sup> Agrobacterium cultures harboring the plasmid encoding NSvc4 (final concentration,  
747 OD<sub>600</sub> = 0, 0.025, 0.05, 0.1 and 0.15) were used to infiltrate *N. benthamiana* leaves.

748 <sup>b</sup> eGFP fluorescent foci of RSV MR3<sub>(-)eGFP</sub> at 5 days post-infiltration.  
749

750

751

752

753

754

755

756

757

758

759

760

761

762

763



764

765 **Figure legends**

766 **Fig. 1** Construction of an RSV RNA3<sub>(-)</sub>-based mini-replicon. (A) Schematics  
767 representing the RdRp<sub>wt</sub>, RdRp<sub>opt</sub>, NP, RSV RNA3<sub>(-)</sub> and MR3<sub>(-)</sub>eGFP mini-replicong.  
768 For MR3<sub>(-)</sub>eGFP, we replaced the NP gene in the gRNA3 with an eGFP gene. The 5'  
769 untranslated, the 3' untranslated, and the intergenic region in RNA3<sub>(-)</sub> were indicated  
770 with a thin black line. 2×35S, doubled 35S promoter; HH, hammerhead ribozyme; RZ,  
771 hepatitis delta virus (HDV) ribozyme; 35S Ter, 35S terminator; NOS, nopaline  
772 synthase terminator. Minus sign (-) and 5' to 3' designation represent the viral  
773 (genomic)-strand of RNA3. (B) Illustration of agro-infiltration using a mixed  
774 Agrobacterium culture carrying various min-replicons into *N. benthamiana* leaves.  
775 VSRs, NSs plus P19-HcPro-γb. (C) A *N. benthamiana* leaf infiltrated with a mixed  
776 Agrobacterium culture carrying MR3<sub>(-)</sub>eGFP, RdRp<sub>wt</sub>, NP and VSRs (NSs and  
777 P19-HcPro-γb). (D) A *N. benthamiana* leaf infiltrated with a mixed Agrobacterium  
778 culture carrying MR3<sub>(-)</sub>eGFP, RdRp<sub>opt</sub>, NP and VSRs (NSs and P19-HcPro-γb) and  
779 was showing eGFP fluorescence at 5 dpi under an inverted fluorescence microscope.  
780 Bar represents 200 μm.

781

782 **Fig. 2** RSV NP and RdRp<sub>opt</sub> are required for MR3<sub>(-)</sub>eGFP expression in *N. benthamiana*  
783 leaves. (A) *N. benthamiana* leaves were infiltrated with mixed *Agrobacterium* cultures  
784 carrying MR3<sub>(-)</sub>eGFP+NSs+P19-HcPro-γb+Vec (empty vector),  
785 MR3<sub>(-)</sub>eGFP+NSs+P19-HcPro-γb+NP, MR3<sub>(-)</sub>eGFP+NSs+P19-HcPro-γb+RdRp<sub>opt</sub>, or

786 MR3<sub>(-)eGFP</sub>+NSs+P19-HcPro- $\gamma$ b+RdRp<sub>opt</sub>. The infiltrated leaves were examined and  
787 photographed under an inverted fluorescence microscope at 5 dpi. Bars = 200  $\mu$ m. (B)  
788 Western blot analyses using the samples described in (A) and an NP or an eGFP  
789 specific antibody. The ponceau S-stained Rubisco large subunit gel was used to show  
790 sample loadings. (C) Northern blot analyses using the samples described in (A) and a  
791 DIG-labeled sense- or an antisense-eGFP probe. The red and blue arrows indicate the  
792 antigenomic and genomic RNA3 expressed the infiltrated leaves. The ethidium  
793 bromide stained ribosomal RNA gel was used to show sample loadings.

794

795 **Fig. 3** Effects of VSRs on pMR3<sub>(-)eGFP</sub> expression. (A) *N. benthamiana* leaves were  
796 infiltrated with mixed *Agrobacterium* cultures as indicated in the figure. The  
797 infiltrated *N. benthamiana* leaves were harvested at 5 dpi, and examined and  
798 photographed under an inverted fluorescence microscope. Bars = 200  $\mu$ m. (B)  
799 Western blot analyses using the samples described in (A), and an NP specific and an  
800 eGFP specific antibodies, respectively. Proteins in the leaves shown in panel (A)  
801 using NP and GFP-specific antibodies, respectively. The ponceau S-stained Rubisco  
802 large subunit gel was used to show sample loadings.

803

804 **Fig. 4** Concentrations of NP and RdRp<sub>opt</sub> needed for the maximum expression  
805 MR3<sub>(-)eGFP</sub>. (A and B) *N. benthamiana* leaves were infiltrated with various mixed  
806 *Agrobacterium* cultures as indicated in the figure. The concentration of  
807 *Agrobacterium* cultures carrying NP or RdRp<sub>opt</sub> ranged from OD<sub>600</sub> = 0 to 0.4. The

808 infiltrated leaves were harvested at 5 dpi, and examined and photographed under an  
809 inverted fluorescence microscope. Bars = 200  $\mu$ m. (C and D) Western blot analyses of  
810 NP and eGFP expressions in the infiltrated leaves described in (A and B) using an NP  
811 specific and an eGFP specific antibodies, respectively. The ponceau S-stained Rubisco  
812 large subunit gel was used to show sample loadings.

813

814 **Fig. 5** Effect of RSV NSvc4 on eGFP expression from MR3<sub>(-)eGFP</sub> in cells. (A) *N.*  
815 *benthamiana* leaves were infiltrated with various mixed Agrobacterium cultures as  
816 described in the figure. The concentration of Agrobacterium culture carrying NSvc4  
817 ranged from OD<sub>600</sub> = 0 to 0.15. The infiltrated leaves were harvested at 5 dpi, and  
818 examined and photographed under an inverted fluorescence microscope. Bars = 200  
819  $\mu$ m. (B) Western blot analyses using the infiltrated leaf samples described in (A), and  
820 an NP specific and an eGFP specific antibodies, respectively. The ponceau S-stained  
821 Rubisco large subunit gel was used to show sample loadings.

822

823 **Fig. 6** Construction and test of RNA3<sub>(+)</sub>-based mini-replicon in *N. benthamiana*  
824 leaves. (A) Schematics representing RNA3<sub>(+)</sub> and MR3<sub>(+)eGFP</sub> mini-replicons. The  
825 MR3<sub>(+)eGFP</sub> mini-replicon was made by replacing the NS3 gene in RNA3<sub>(+)</sub> with an  
826 *eGFP* gene. Plus sign (+) and 3' to 5' designation represent the viral complementary  
827 (antigenomic)-strand of RNA3. (B) *N. benthamiana* leaves were infiltrated with  
828 various mixed Agrobacterium cultures as described in the figure. The infiltrated  
829 leaves were observed at 5 dpi, and examined and photographed under an inverted

830 fluorescence microscope. Bars = 200  $\mu$ m. (C) Schematics representing MR3<sub>(-)eGFP</sub> and  
831 MR3<sub>(-)mCherry&eGFP</sub> mini-replicons. The MR3<sub>(-)mCherry&eGFP</sub> mini-replicon was  
832 constructed by replacing the *NS3* gene with an *mCherry* gene. Minus sign (-) and 5' to  
833 3' designation represent the viral (genomic)-strand of RNA3. (D) The infiltrated *N.*  
834 *benthamiana* leaves were harvested at 5 dpi, and examined and photographed under  
835 an inverted fluorescence microscope. Bars = 200  $\mu$ m. (E) Northern blot analyses of  
836 RNA3 expressions from RNA3<sub>(+)</sub> in the infiltrated leaves as described in (C). After  
837 electrophoresis, the blots were probed with a DIG-labeled antisense and a sense  
838 RNA3 probes, respectively. The red and blue arrow heads indicate the RNA3 bands  
839 probed with DIG-labeled probes. The ethidium bromide stained ribosomal RNA  
840 (rRNA) gel was used to show sample loadings.

841

842 **Fig. 7** Effect of NS3 on *eGFP* gene expression from the mini-replicons. (A and D)  
843 Schematics representing MR3<sub>(-)eGFP</sub> and its mutants. For MR3<sub>(-)eGFP $\Delta$ NS3</sub>, the *NS3* gene  
844 was deleted from MR3<sub>(-)eGFP</sub>. For MR3<sub>(-)eGFP&NS3stop</sub>, a stop codon was introduced at  
845 the downstream of the start codon of the *NS3* gene in pMR3<sub>(-)eGFP</sub>. For MR3<sub>(-)eGFPMut1</sub>  
846 to 4 mutant mini-replicons, a quarter of the *NS3* gene in MR3<sub>(-)eGFP</sub> was deleted as  
847 shown in the figure. Minus sign (-) and 5' to 3' designation represent the viral  
848 (genomic)-strand of RNA3. (B and E) *N. benthamiana* leaves were infiltrated with  
849 various mixed *Agrobacterium* cultures as described in the figure. The infiltrated  
850 leaves were harvested at 5 dpi, and examined and photographed under an inverted  
851 fluorescence microscope. Bars = 200  $\mu$ m. (C and F) Western blot analyses using the

852 leaf samples described in (B and E), and an NP specific and an eGFP specific  
853 antibodies, respectively. The ponceau S-stained Rubisco large subunit gels were used  
854 to show sample loadings. (G) Northern blot analyses of antigenomic and genomic  
855 RNA expressions from MR3<sub>(-)eGFP</sub> using a DIG-labeled antisense- and a sense-eGFP  
856 probe, respectively. The ethidium bromide-stained ribosomal RNA gel was used to  
857 show sample loadings.

858

859 **Fig. 8** RNA secondary structures of the 3'-UTR, NS3 ORF and IGR region of RSV  
860 RNA3 segment. Secondary structure was predicted using the RNA fold web server  
861 (<http://rna.tbi.univie.ac.at/cgi-bin/RNAWebSuite/RNAfold.cgi>) based on  
862 thermodynamic prediction of minimal free energy (MFE). Red, black and blue arrows  
863 indicated the nucleotide positions in 3'-UTR, NS3 and IGR regions, respectively.  
864 Dotted boxes indicated that Hairpin 1 and 2 were formed by IGR, NS3 and 3'-UTR of  
865 RSV RNA3, respectively.

866

867 **Fig. 9** Establishment of complete mini-replicon systems representing RSV RNA1,  
868 RNA2, RNA3, and RNA4 genomic RNA segments in *N. benthamiana* leaves. (A)  
869 Schematics representing MR1<sub>(-)eGFP</sub>, MR2<sub>(-)eGFP</sub>, and MR4<sub>(-)eGFP</sub> mini-replicons. The  
870 RSV *RdRp* gene in MR1<sub>(-)eGFP</sub>, the *NSvc2* gene in MR2<sub>(-)eGFP</sub>, and the *NSvc4* gene in  
871 MR4<sub>(-)eGFP</sub> were replaced with an *eGFP* gene to produce MR1<sub>(-)eGFP</sub>, MR2<sub>(-)eGFP</sub>, and  
872 MR4<sub>(-)eGFP</sub>, respectively. Minus sign (-) and 5' to 3' designation represent the viral  
873 (genomic)-strand of RNA1, 2 and 4. (B) *N. benthamiana* leaves were infiltrated with

874 various mixed *Agrobacterium* cultures as described in the figures. The infiltrated leaf  
875 tissues were harvested at 5 dpi, and examined and photographed under an inverted  
876 fluorescence microscope. Bars = 200  $\mu$ m.

877

878 **Table S1.** List of primers used in the study.

879

880 **Table S2.** The predicted intron splicing sites of wild-type RdRp gene.

881

882 **Table S3** Optimized RdRp gene sequence made in this study.

883

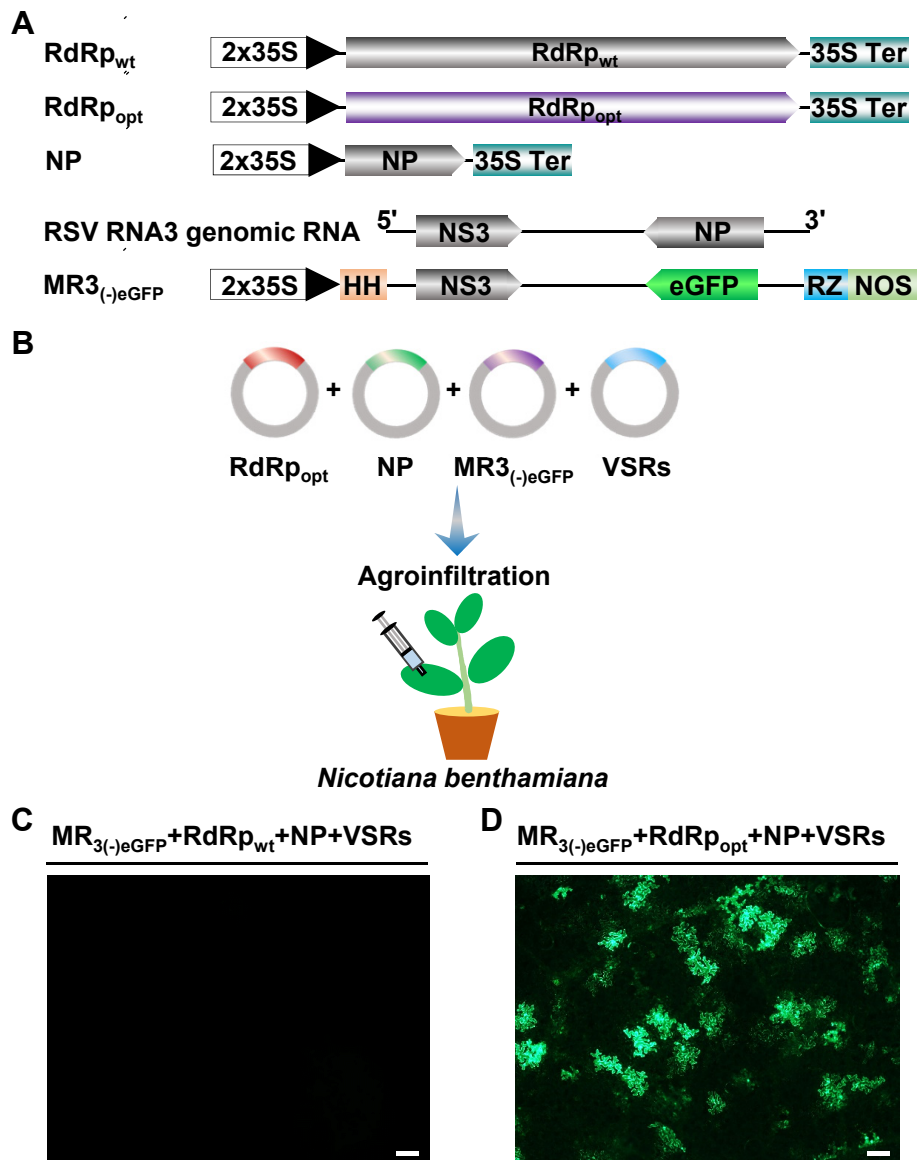

Fig. 1

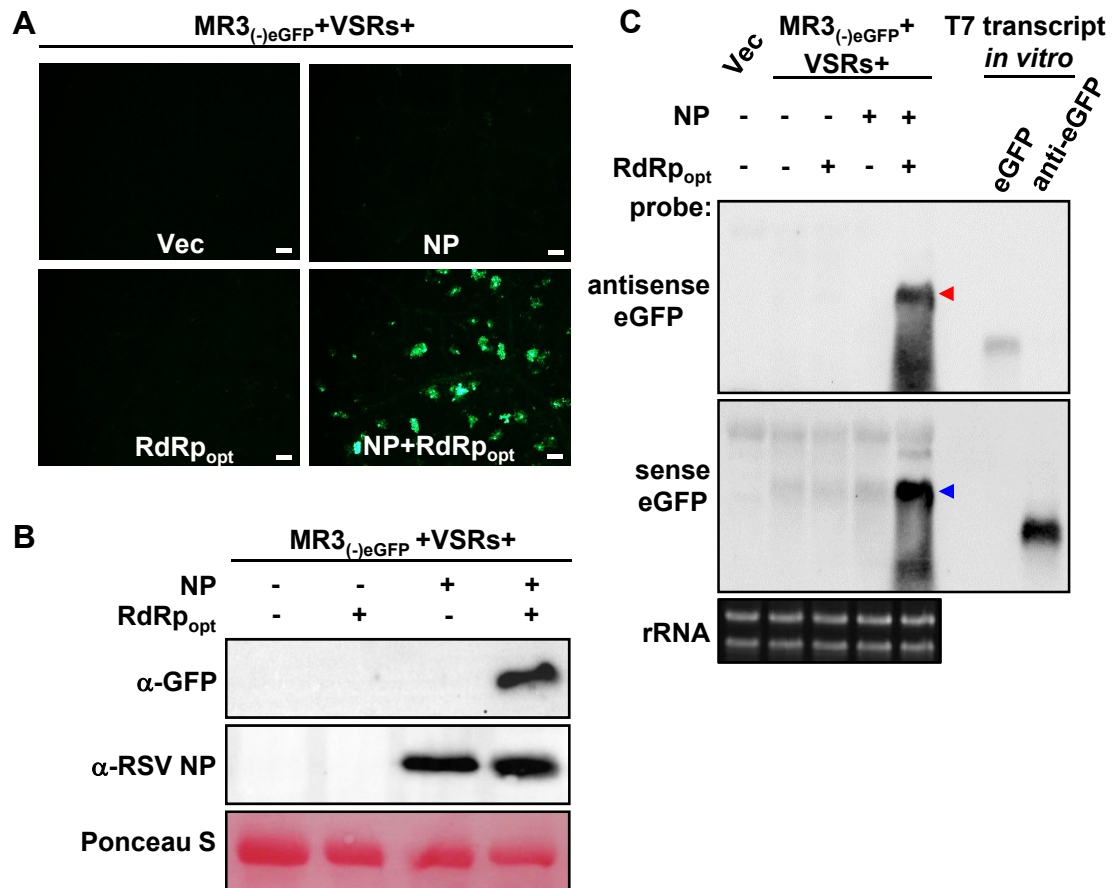

Fig. 2



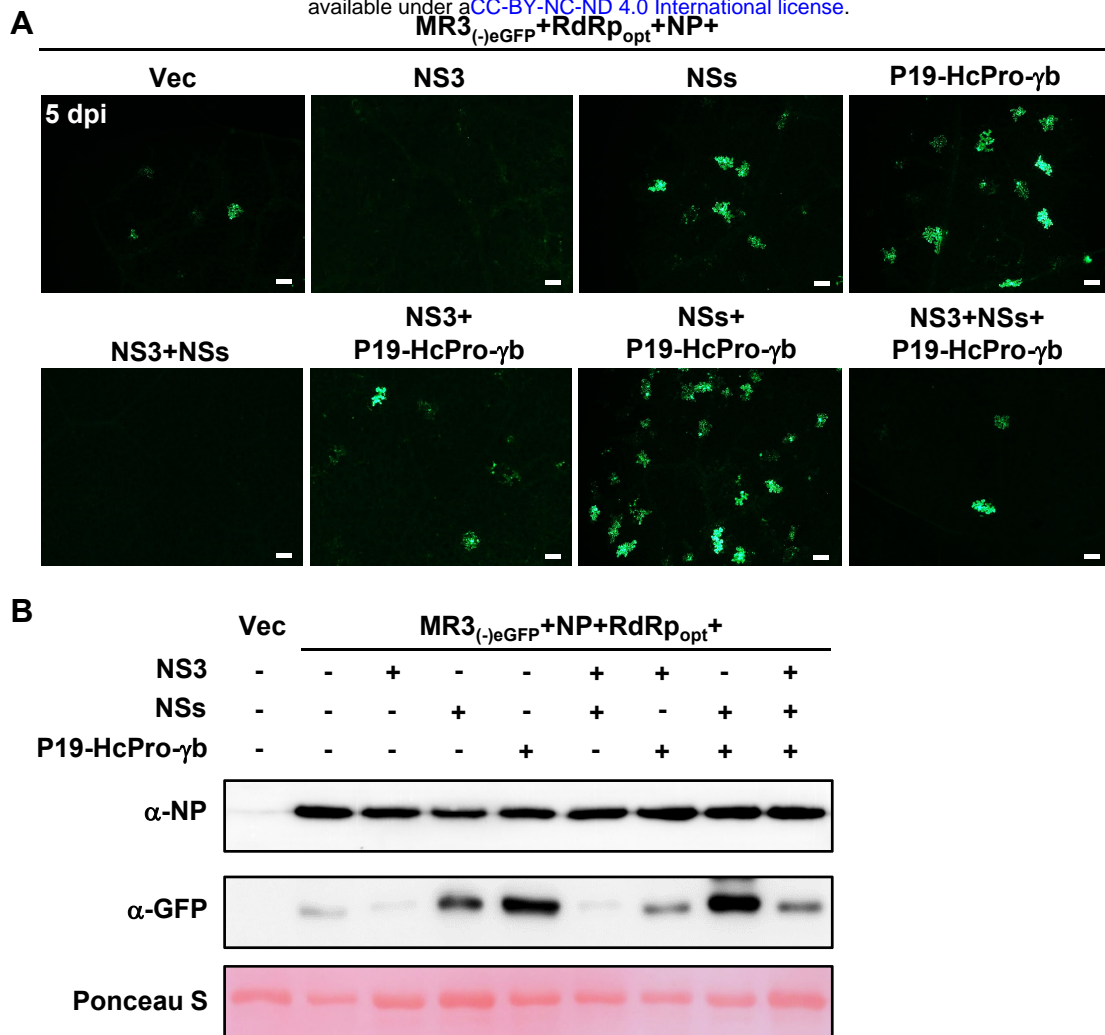

**Fig. 3**

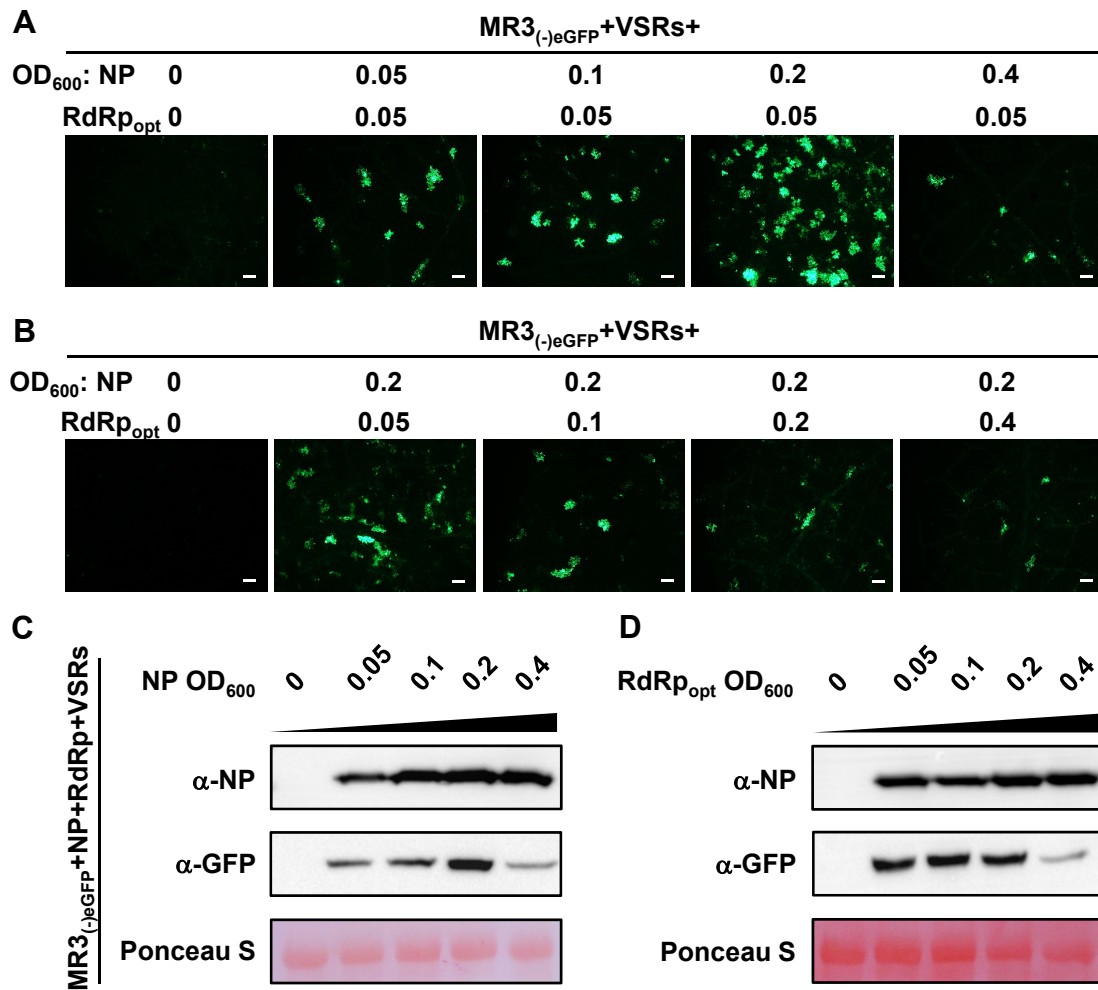

**Fig. 4**

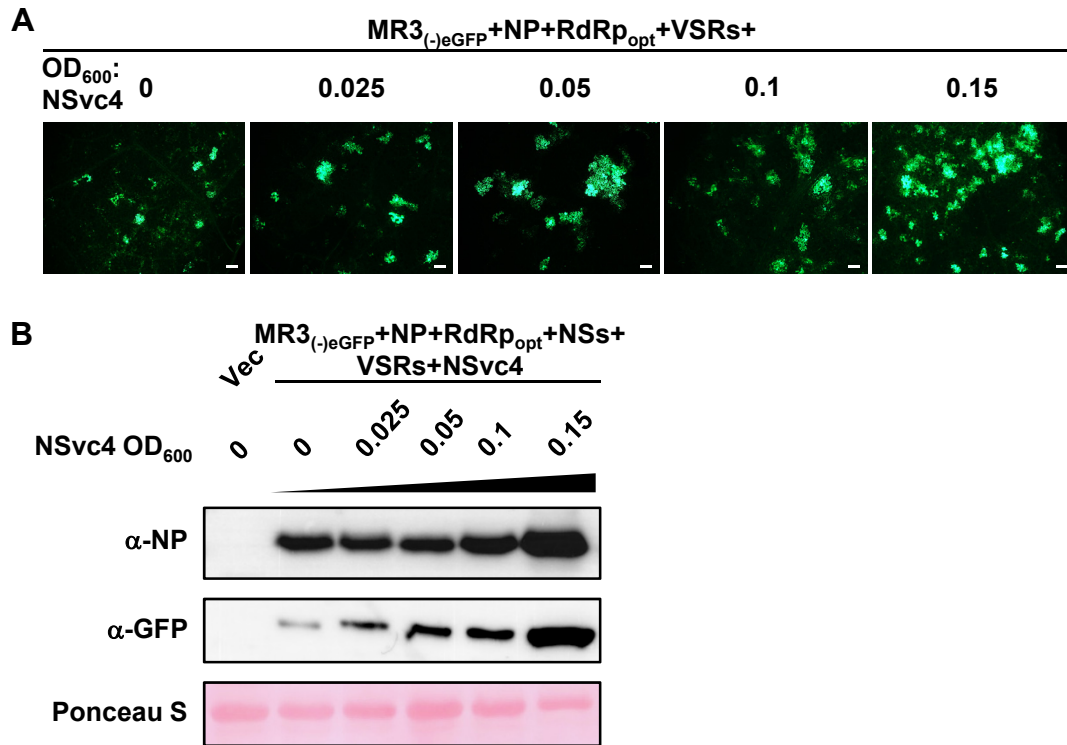

**Fig. 5**

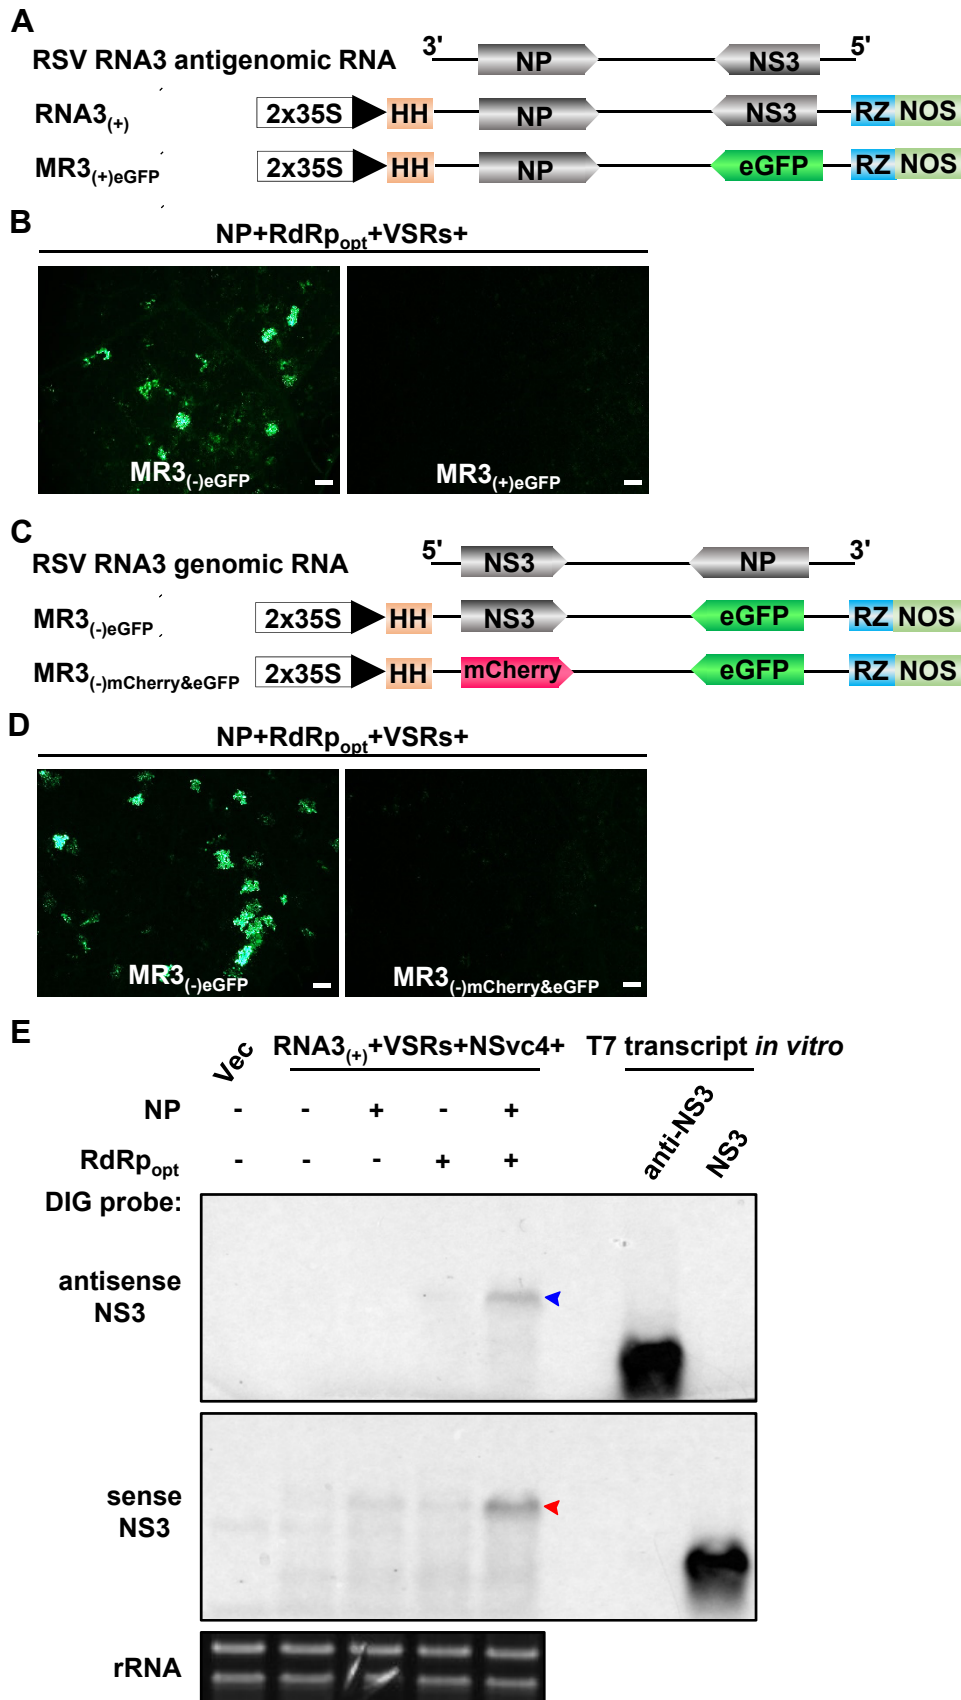

Fig. 6

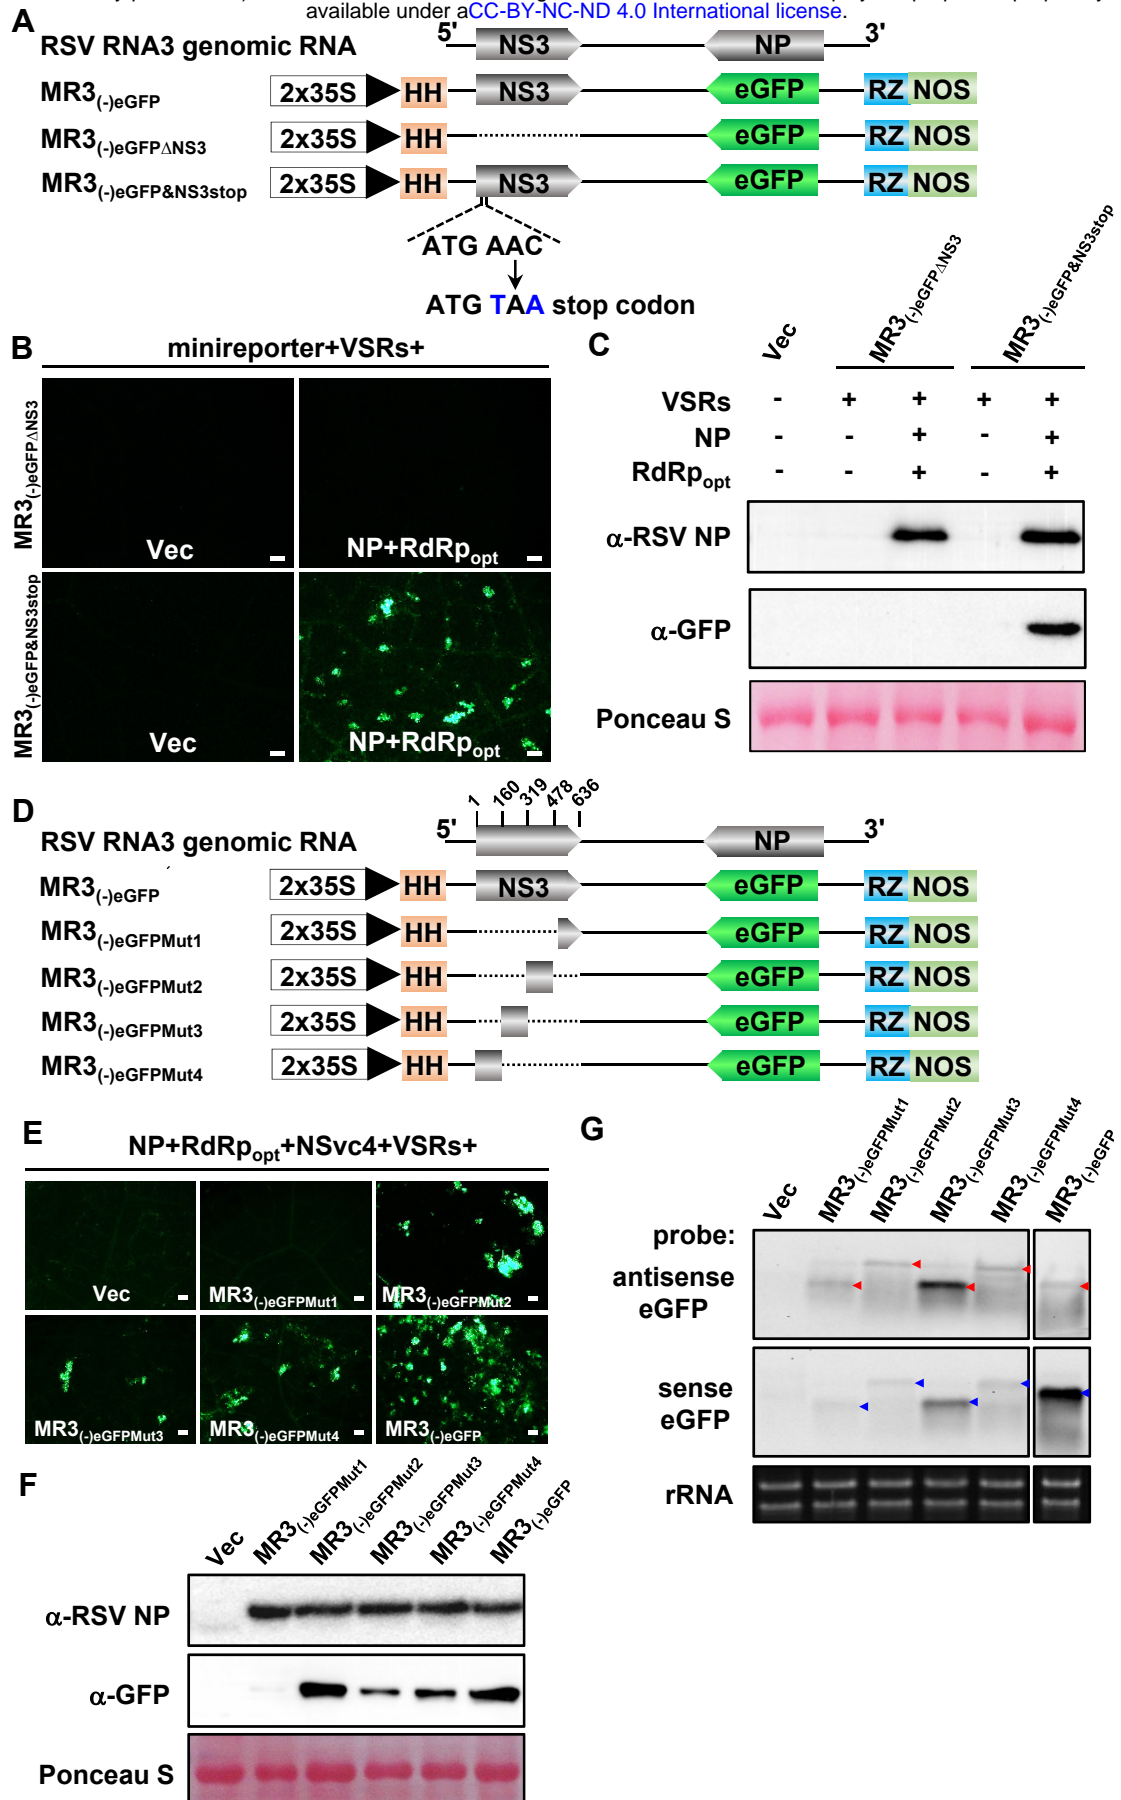

Fig. 7

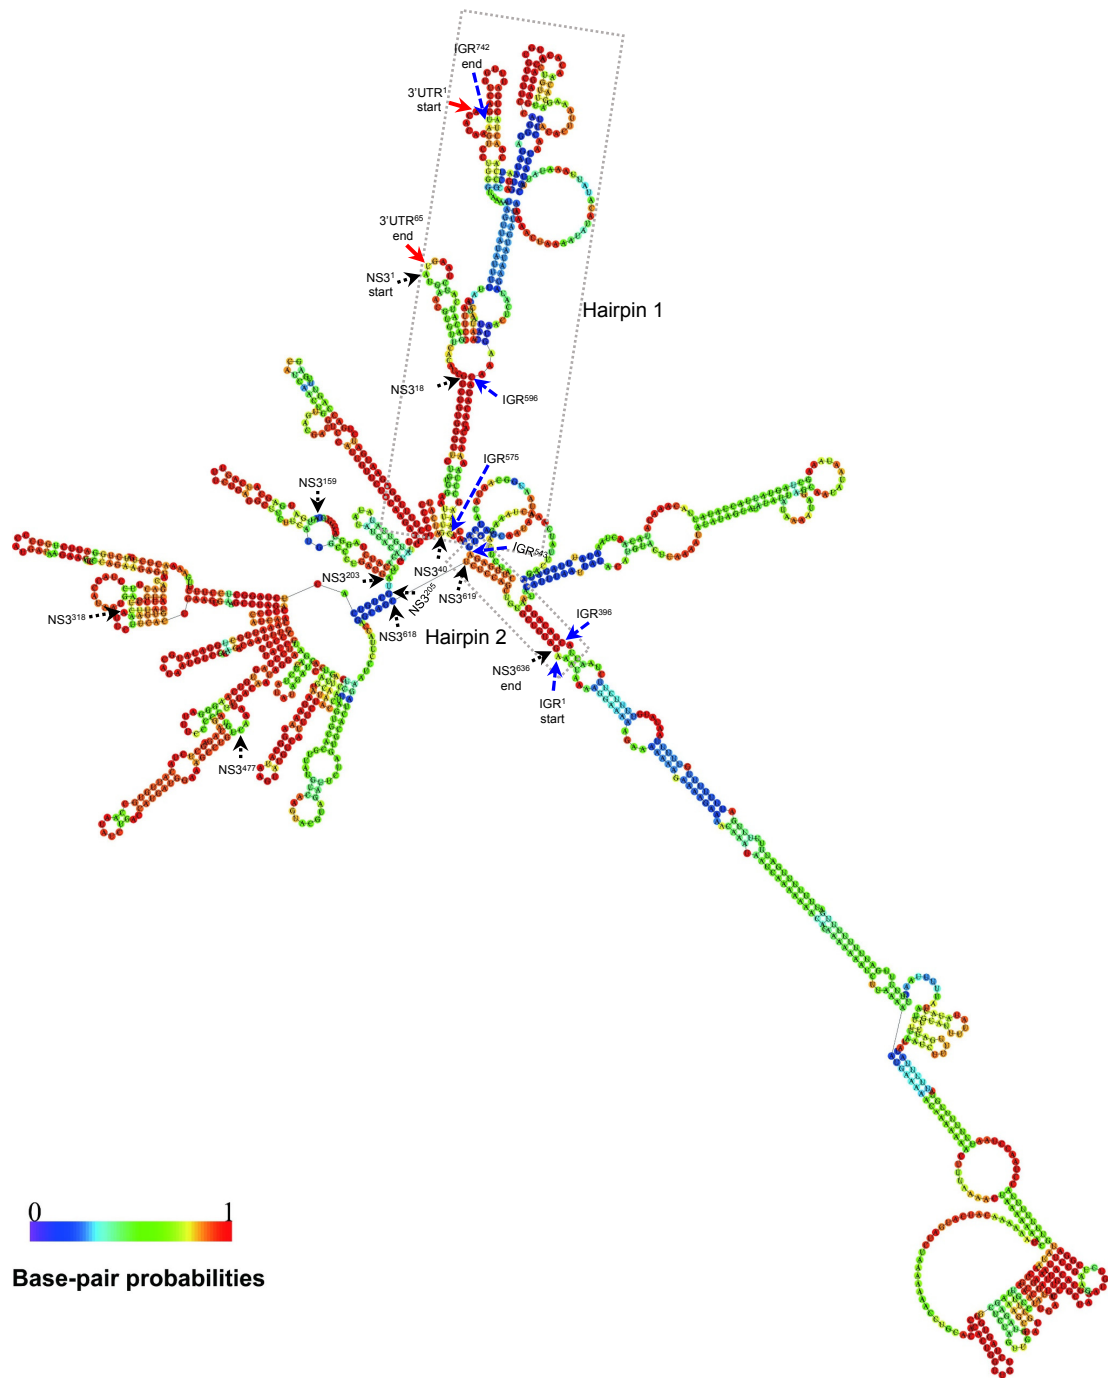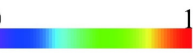

Base-pair probabilities

Fig. 8

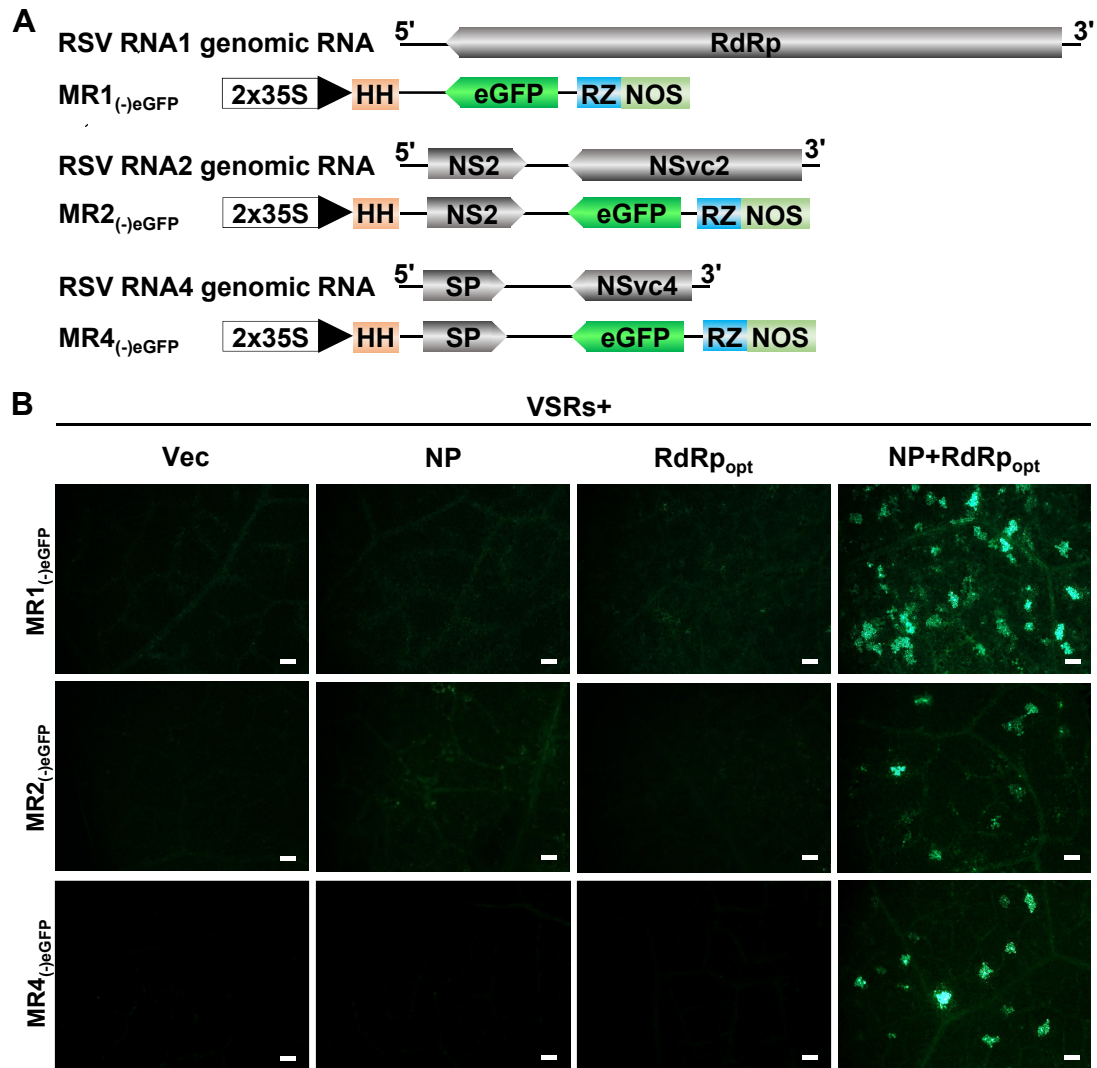

**Fig. 9**
